# Supplementary material for: Global Cancer in Women: Burden and Trends
Source: Oxford University Press journal article supplement (doi:10.1158/1055-9965.epi-16-0858), 2017-02-21

**Supplementary Table S1.** Leading causes of death among females worldwide, 2012

| **Rank** | **Top ten causes of death** | **Deaths (thousands)** | **%** |
| --- | --- | --- | --- |
| 1 | Cardiovascular diseases | 8,820 | 34 |
| 2 | Malignant neoplasms | 3,544 | 14 |
| 3 | Infectious and parasitic diseases | 3,016 | 12 |
| 4 | Respiratory diseases | 1,756 | 7 |
| 5 | Respiratory infections | 1,461 | 6 |
| 6 | Unintentional injuries | 1,328 | 5 |
| 7 | Neonatal conditions | 1,097 | 4 |
| 8 | Digestive diseases | 929 | 4 |
| 9 | Neurological conditions | 821 | 3 |
| 10 | Diabetes mellitus | 813 | 3 |
|  | All causes | 26,023 |  |

**Supplementary Table S2.** Leading causes of death among females by world region, 2012

| **Rank** | **Top ten causes of death** | **Deaths (thousands)** | **%** | **Top ten causes of death** | **Deaths (thousands)** | **%** |
| --- | --- | --- | --- | --- | --- | --- |
|  | **Africa** |  |  | **Americas** |  |  |
| 1 | Infectious and parasitic diseases | 1,568 | 35 | Cardiovascular diseases | 934 | 31 |
| 2 | Cardiovascular diseases | 513 | 12 | Malignant neoplasms | 615 | 20 |
| 3 | Respiratory infections | 479 | 11 | Neurological conditions | 259 | 9 |
| 4 | Neonatal conditions | 393 | 9 | Respiratory diseases | 200 | 7 |
| 5 | Unintentional injuries | 253 | 6 | Diabetes mellitus | 161 | 5 |
| 6 | Malignant neoplasms | 232 | 5 | Digestive diseases | 137 | 5 |
| 7 | Nutritional deficiencies | 174 | 4 | Respiratory infections | 132 | 4 |
| 8 | Maternal conditions | 171 | 4 | Unintentional injuries | 110 | 4 |
| 9 | Digestive diseases | 134 | 3 | Infectious and parasitic diseases | 110 | 4 |
| 10 | Diabetes mellitus | 99 | 2 | Genitourinary diseases | 91 | 3 |
|  | All causes | 4,446 |  | All causes | 3,011 |  |
|  | **South-East Asia** |  |  | **Europe** |  |  |
| 1 | Cardiovascular diseases | 1,685 | 27 | Cardiovascular diseases | 2,406 | 53 |
| 2 | Infectious and parasitic diseases | 889 | 14 | Malignant neoplasms | 886 | 20 |
| 3 | Respiratory diseases | 661 | 11 | Neurological conditions | 215 | 5 |
| 4 | Malignant neoplasms | 554 | 9 | Digestive diseases | 190 | 4 |
| 5 | Unintentional injuries | 436 | 7 | Respiratory diseases | 161 | 4 |
| 6 | Neonatal conditions | 402 | 6 | Unintentional injuries | 123 | 3 |
| 7 | Respiratory infections | 376 | 6 | Respiratory infections | 102 | 2 |
| 8 | Digestive diseases | 243 | 4 | Diabetes mellitus | 87 | 2 |
| 9 | Diabetes mellitus | 208 | 3 | Infectious and parasitic diseases | 86 | 2 |
| 10 | Genitourinary diseases | 181 | 3 | Genitourinary diseases | 75 | 2 |
|  | All causes | 6,216 |  | All causes | 4,527 |  |
|  | **Eastern Mediterranean** |  |  | **Western Pacific** |  |  |
| 1 | Cardiovascular diseases | 523 | 29 | Cardiovascular diseases | 2,730 | 71 |
| 2 | Infectious and parasitic diseases | 220 | 12 | Malignant neoplasms | 1,064 | 28 |
| 3 | Malignant neoplasms | 174 | 10 | Respiratory diseases | 602 | 16 |
| 4 | Neonatal conditions | 162 | 9 | Unintentional injuries | 299 | 8 |
| 5 | Respiratory infections | 139 | 8 | Respiratory infections | 228 | 6 |
| 6 | Unintentional injuries | 103 | 6 | Diabetes mellitus | 187 | 5 |
| 7 | Digestive diseases | 76 | 4 | Digestive diseases | 144 | 4 |
| 8 | Diabetes mellitus | 63 | 4 | Infectious and parasitic diseases | 142 | 4 |
| 9 | Respiratory diseases | 56 | 3 | Neurological conditions | 106 | 3 |
| 10 | Genitourinary diseases | 50 | 3 | Genitourinary diseases | 103 | 3 |
|  | All causes | 1,792 |  | All causes | 3,870 |  |

**Supplementary Table S3.** Estimated number of new cancer cases and deaths among females by world area, 2012*

| **World area** | **Cases (thousands)** | **Deaths (thousands)** |
| --- | --- | --- |
| **Africa** | | |
| Eastern Africa | 171 | 116 |
| Middle Africa | 44 | 31 |
| Northern Africa | 115 | 67 |
| Southern Africa | 43 | 26 |
| Western Africa | 113 | 74 |
| **Asia** | | |
| Eastern Asia | 1,714 | 1,002 |
| South-central Asia | 802 | 490 |
| South-eastern Asia | 404 | 238 |
| Western Asia | 149 | 79 |
| **Americas** | | |
| Caribbean | 43 | 24 |
| Central America | 110 | 57 |
| Northern America | 866 | 329 |
| South America | 410 | 209 |
| **Europe** | | |
| Central and Eastern Europe | 523 | 287 |
| Northern Europe | 254 | 116 |
| Southern Europe | 339 | 163 |
| Western Europe | 496 | 214 |
| **Oceania** | | |
| Australia/New Zealand | 62 | 23 |
| Melanesia | 6 | 4 |
| Micronesia | 0.4 | 0.1 |
| Polynesia | 0.6 | 0.3 |

*All sites excluding non-melanoma skin cancers

**Supplementary Figure S1.** Female breast cancer incidence and mortality rates, age-standardized rate (world), 2012


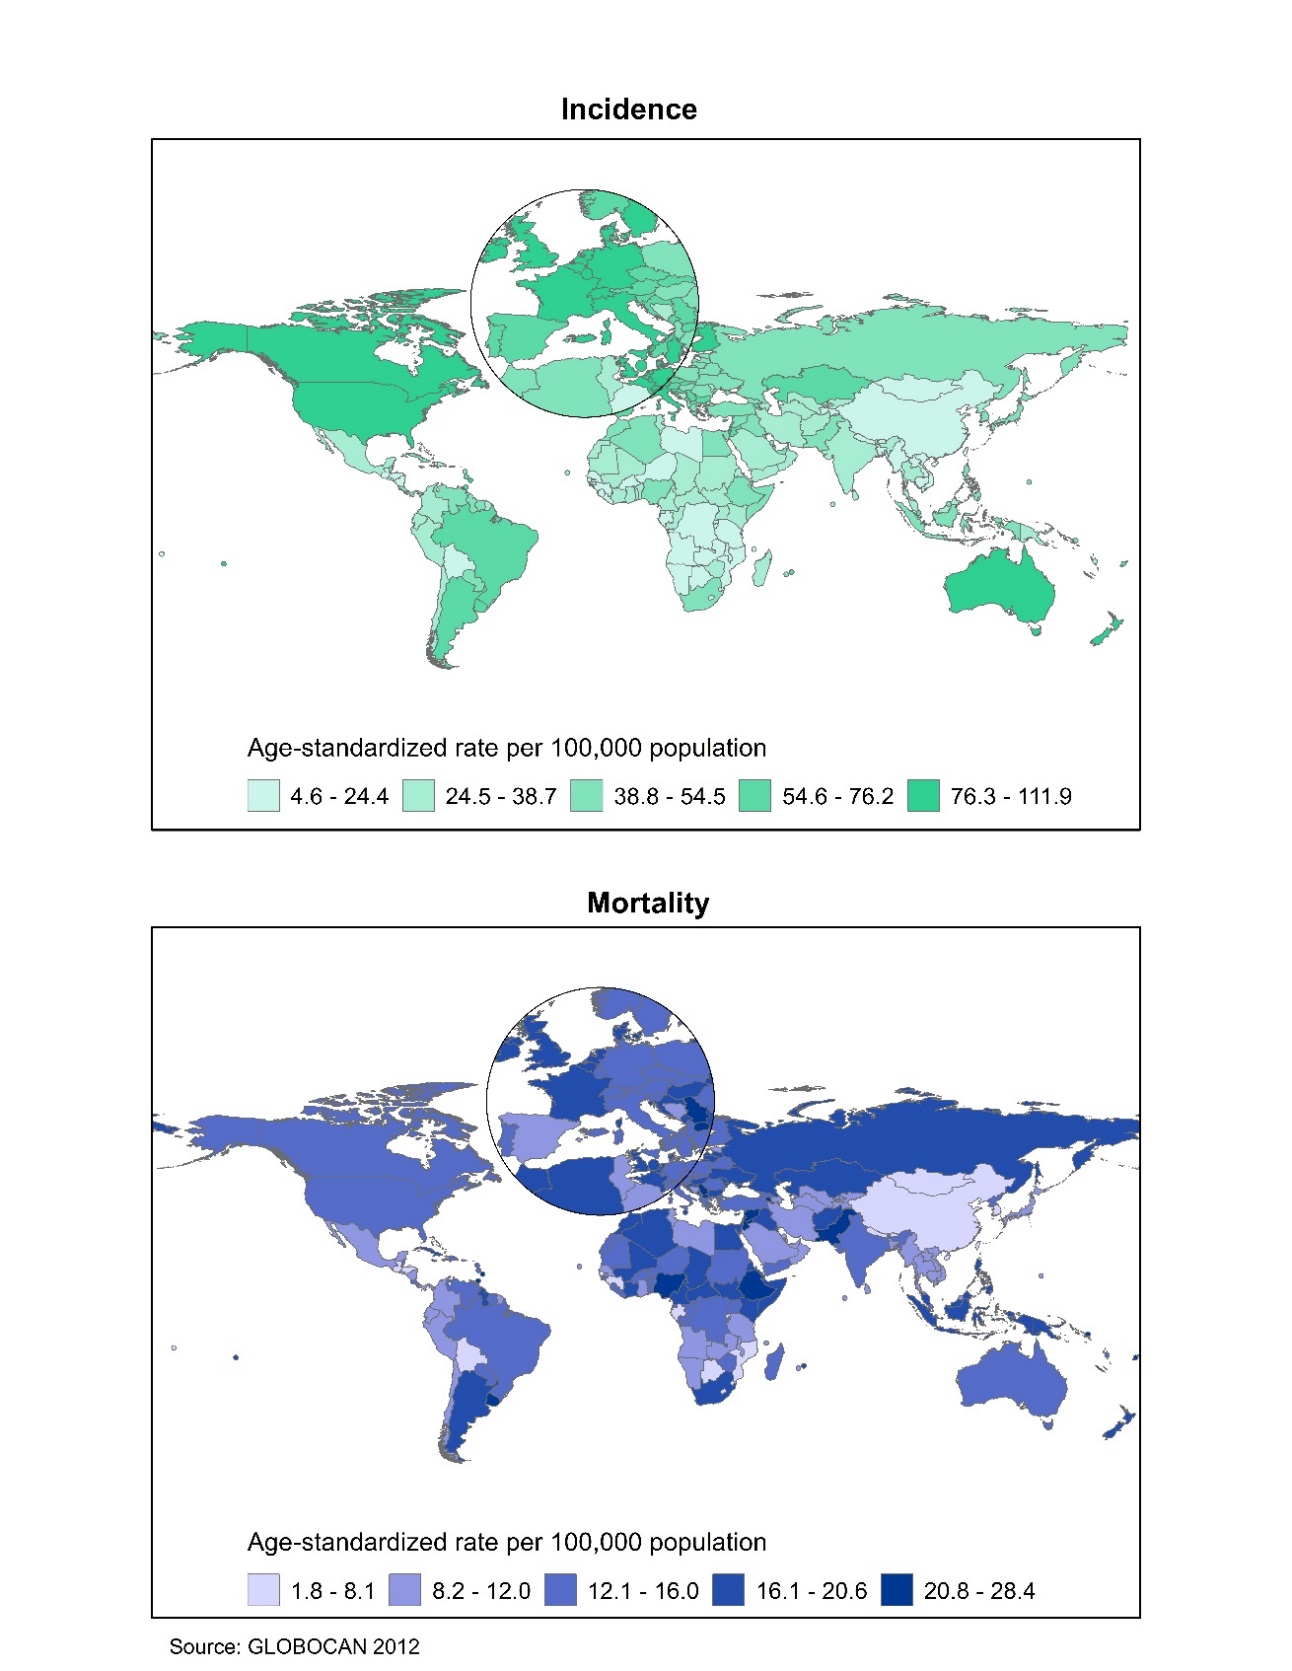


**Supplementary Figure S2.** Female breast cancer incidence trends, age-standardized rate (world), select countries, 1973-2012


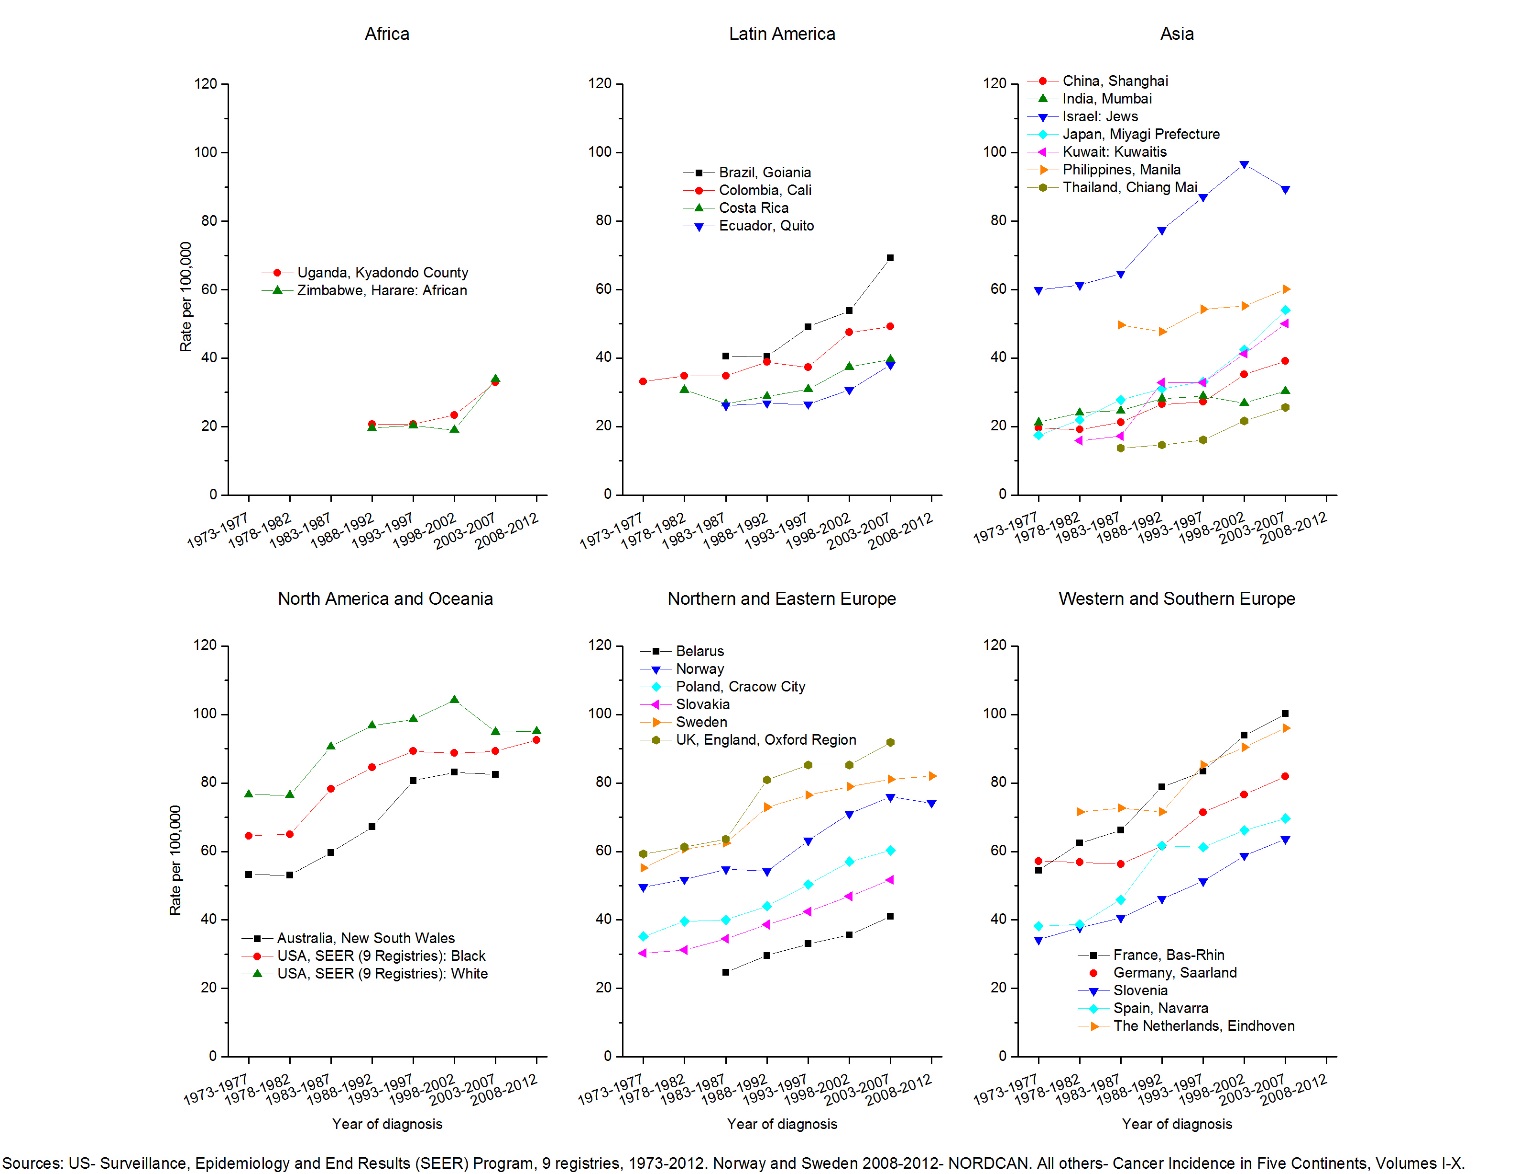


**Supplementary Figure S3.** Female breast cancer survivors diagnosed in last five years (through 2012 or latest available)


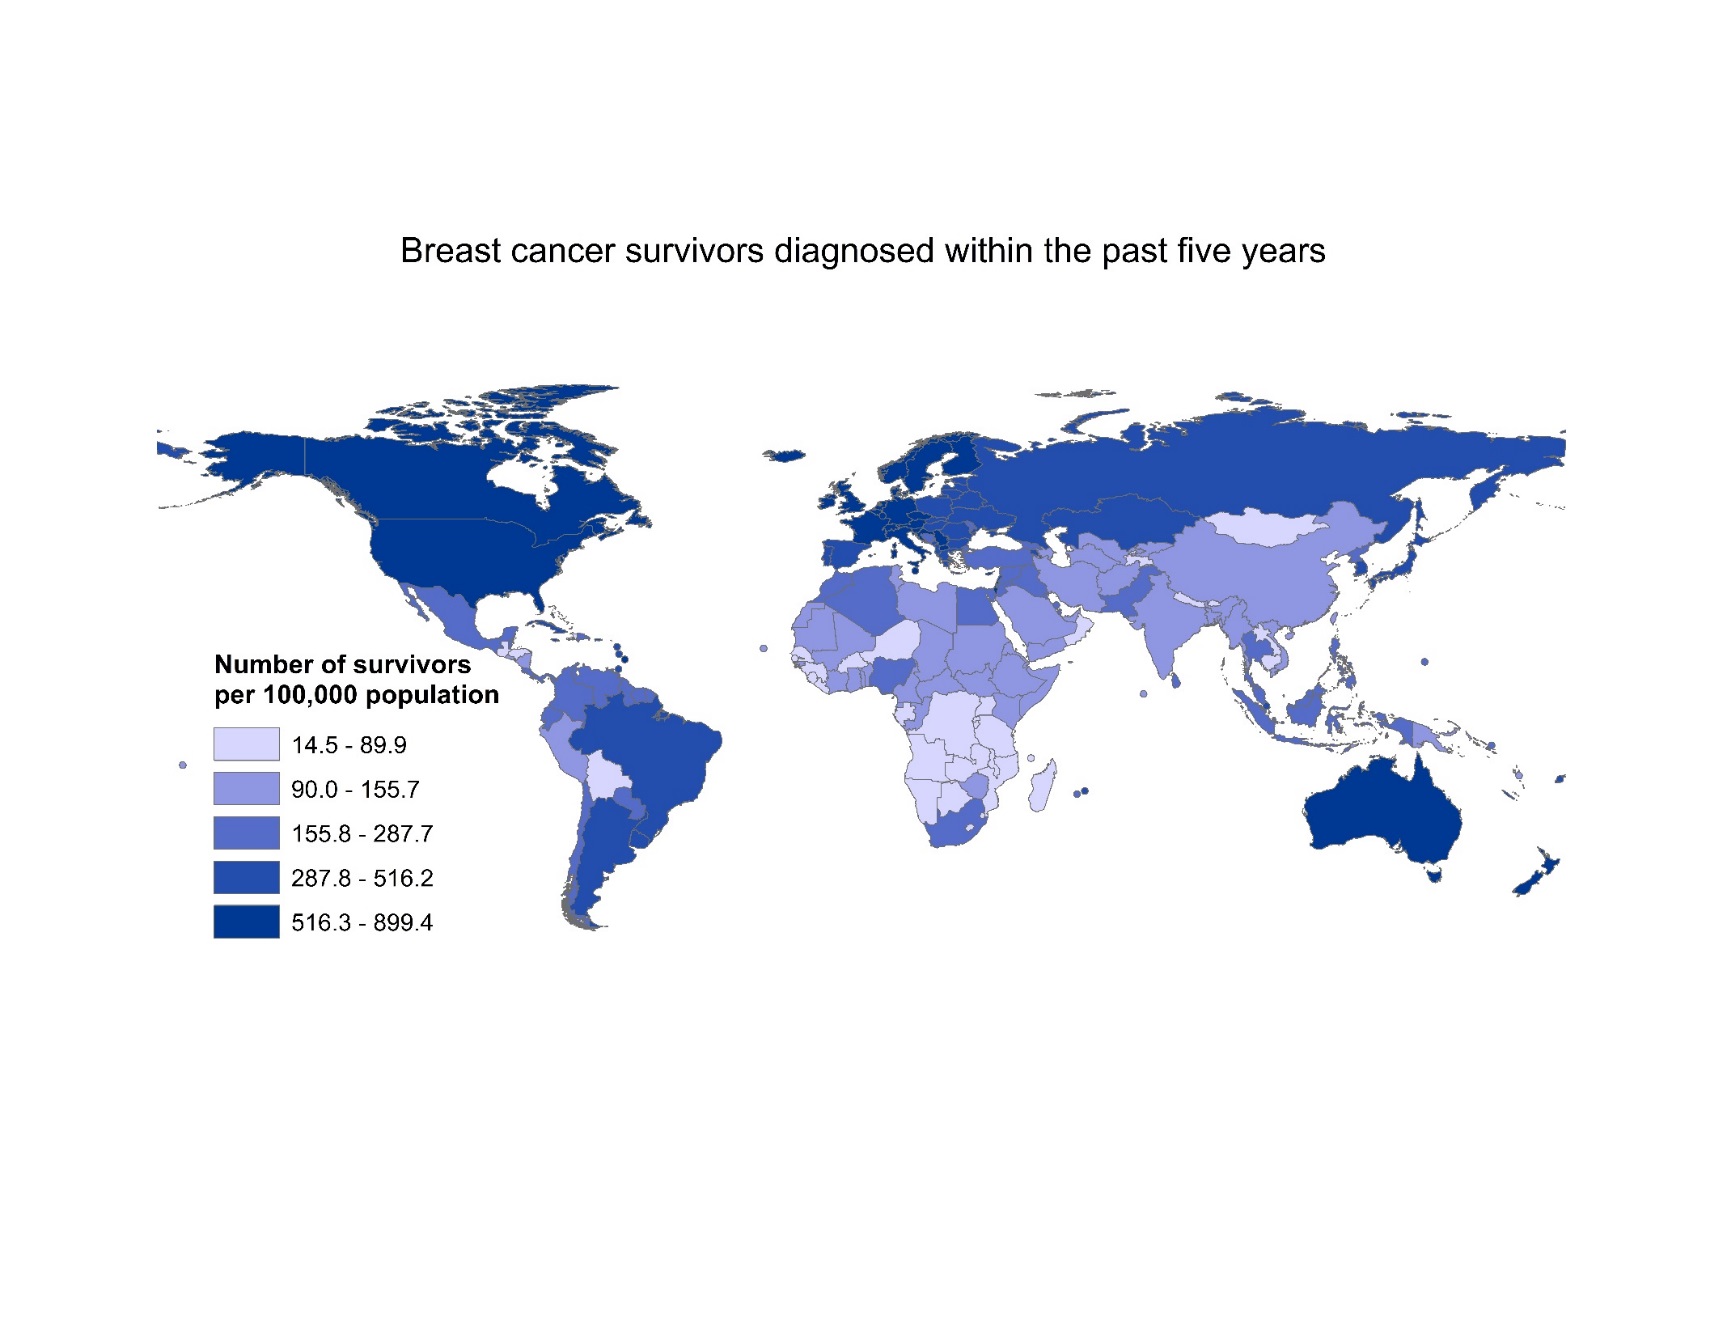


**Supplementary Figure S4.** Cervical cancer incidence and mortality rates, age-standardized rate (world), 2012


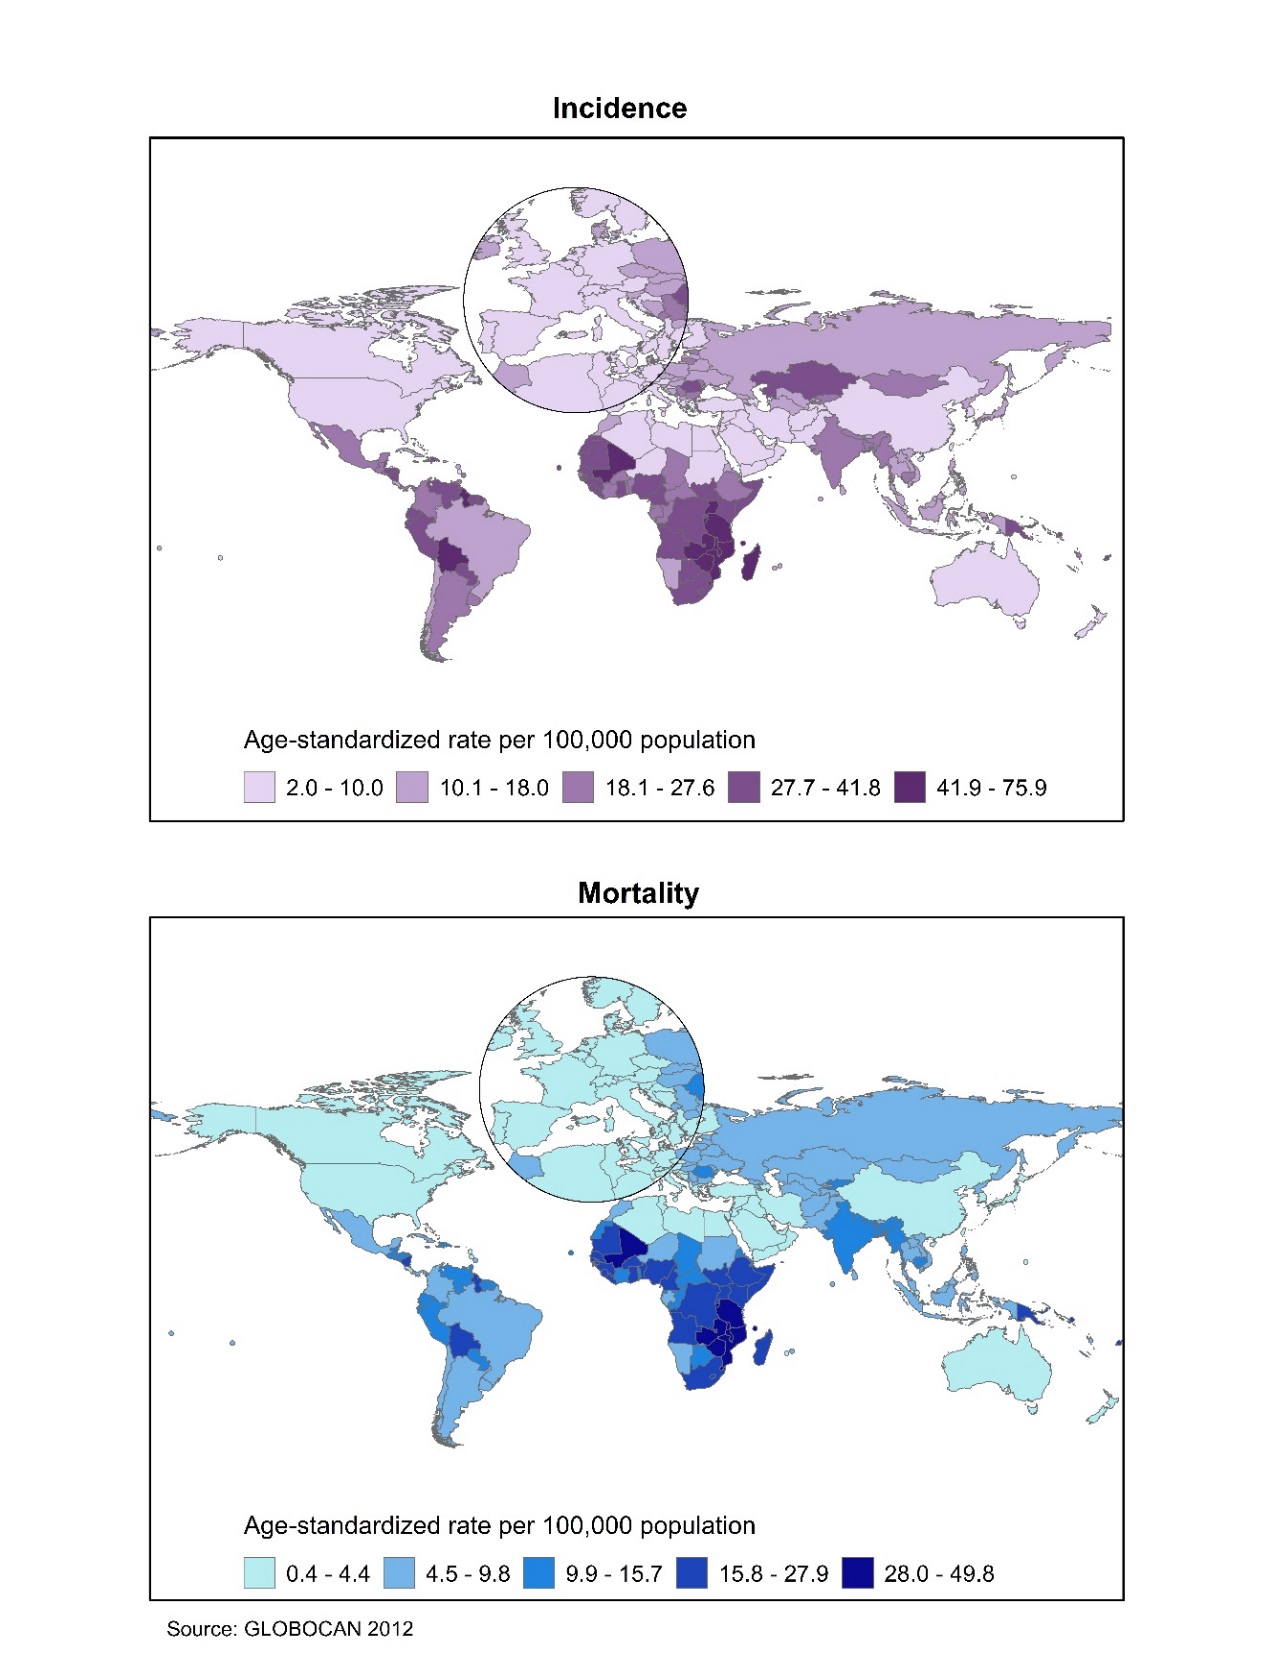


**Supplementary Figure S5.** Prevalence (%) of cervical HPV infection among women by region, all types combined, 1995-2009


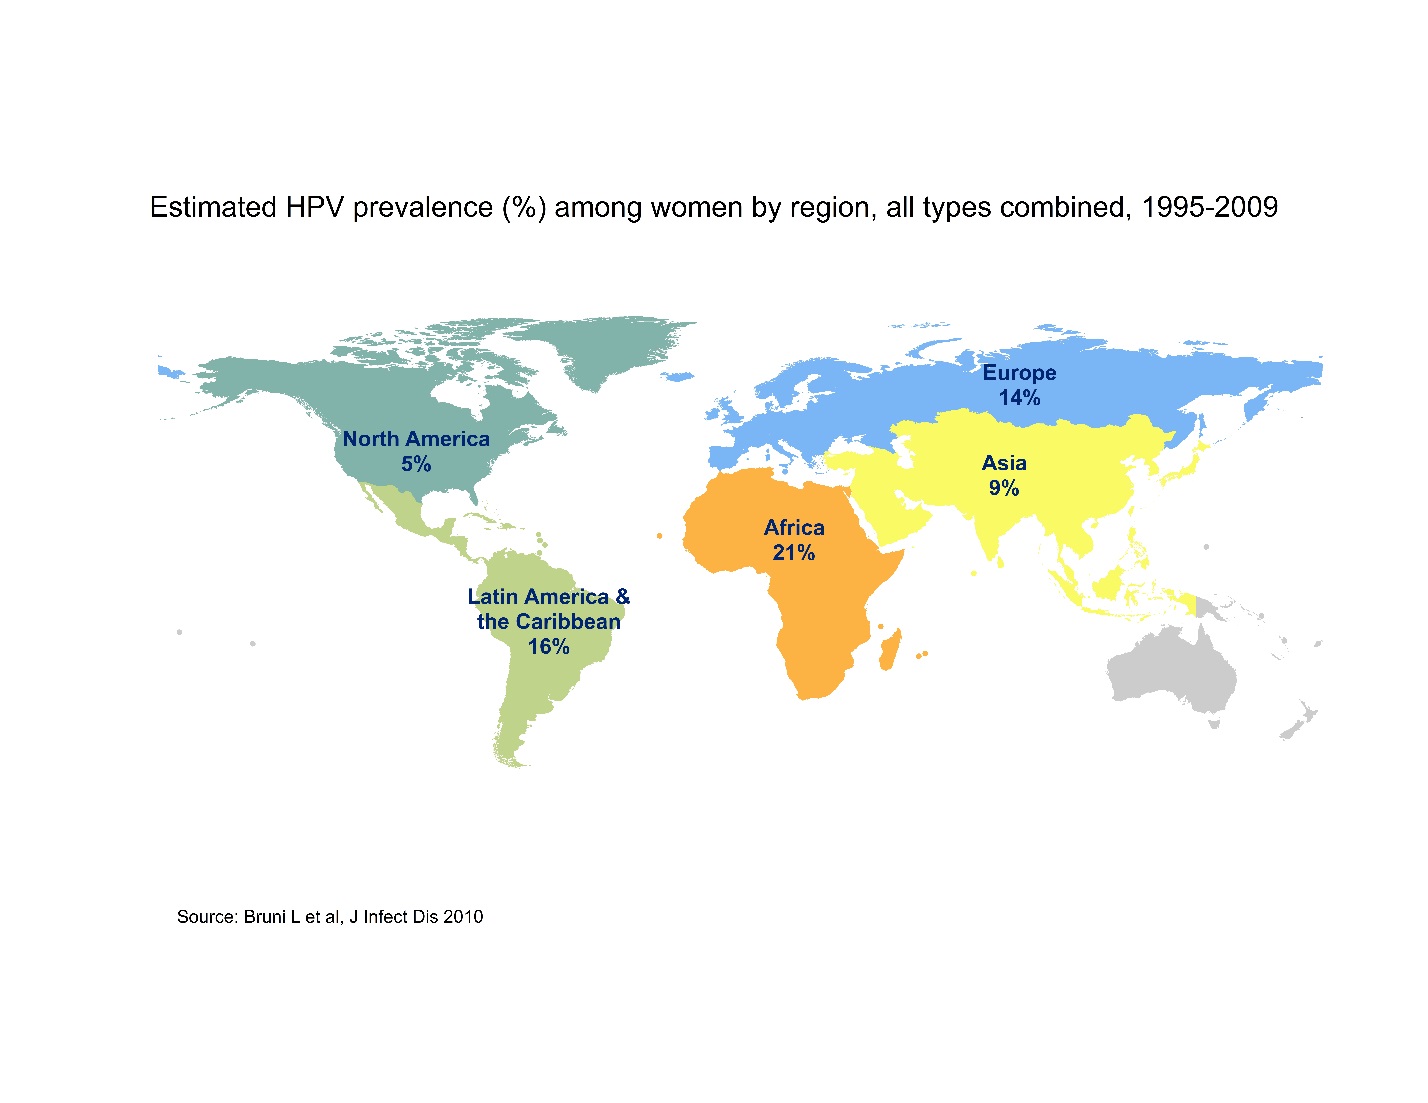


**Supplementary Figure S6.** Cervical cancer incidence trends, age-standardized rate (world), select countries, 1975-2007


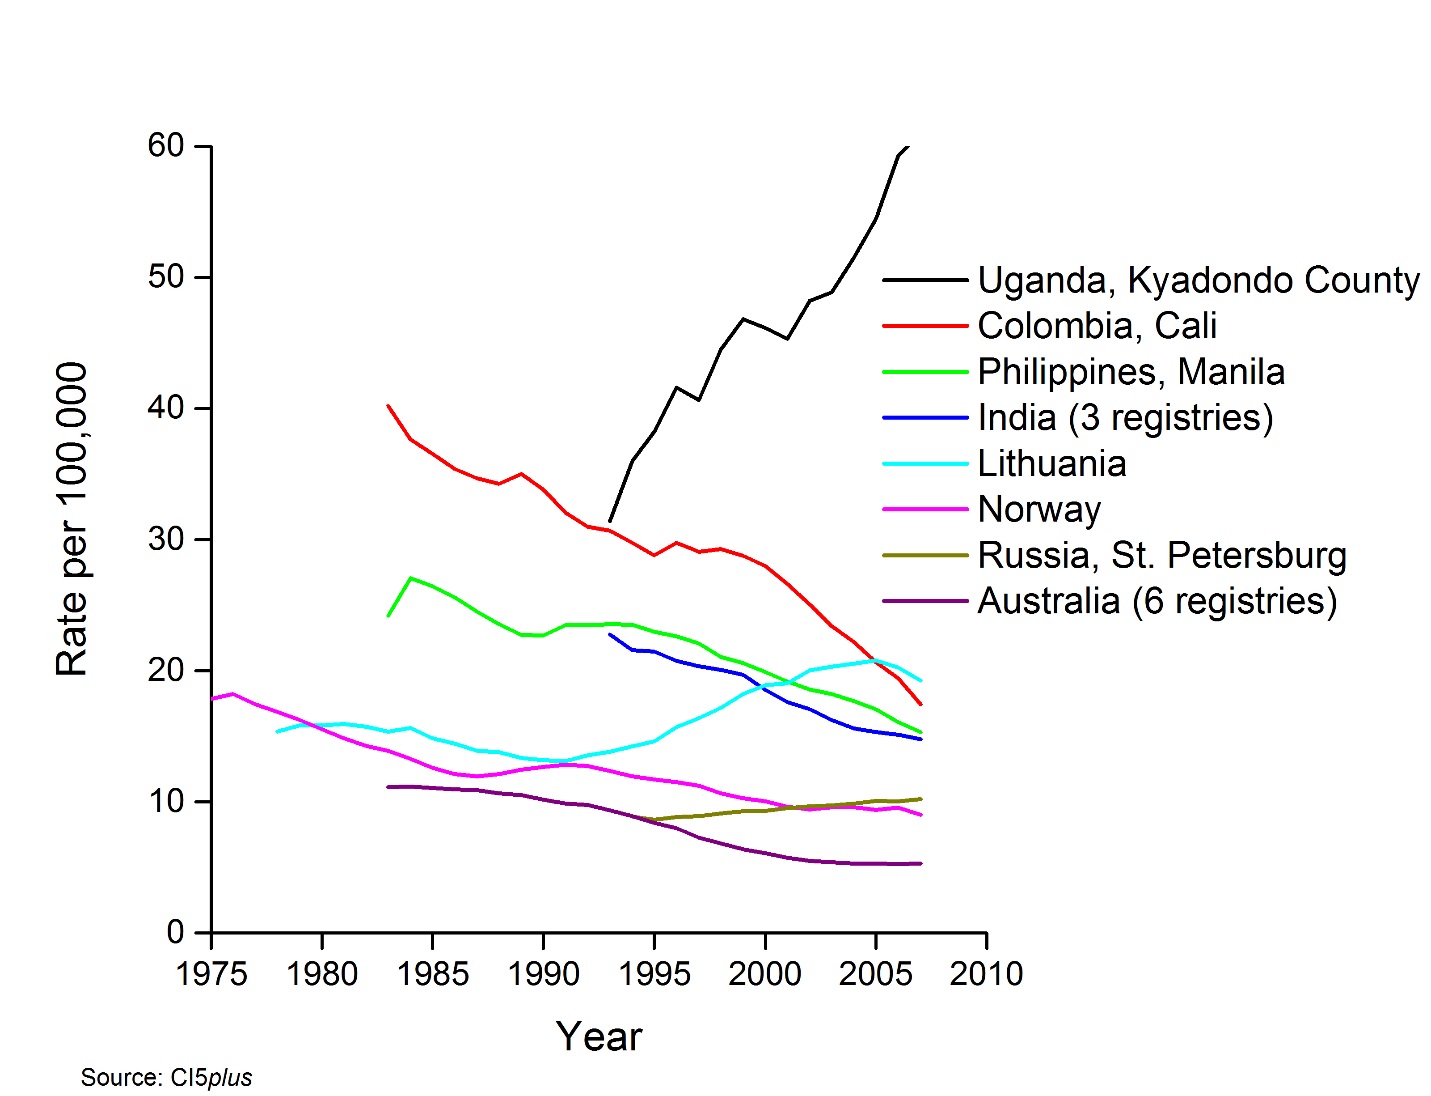


**Supplementary Figure S7.** Cervical cancer survivors diagnosed in last five years (through 2012 or latest available)


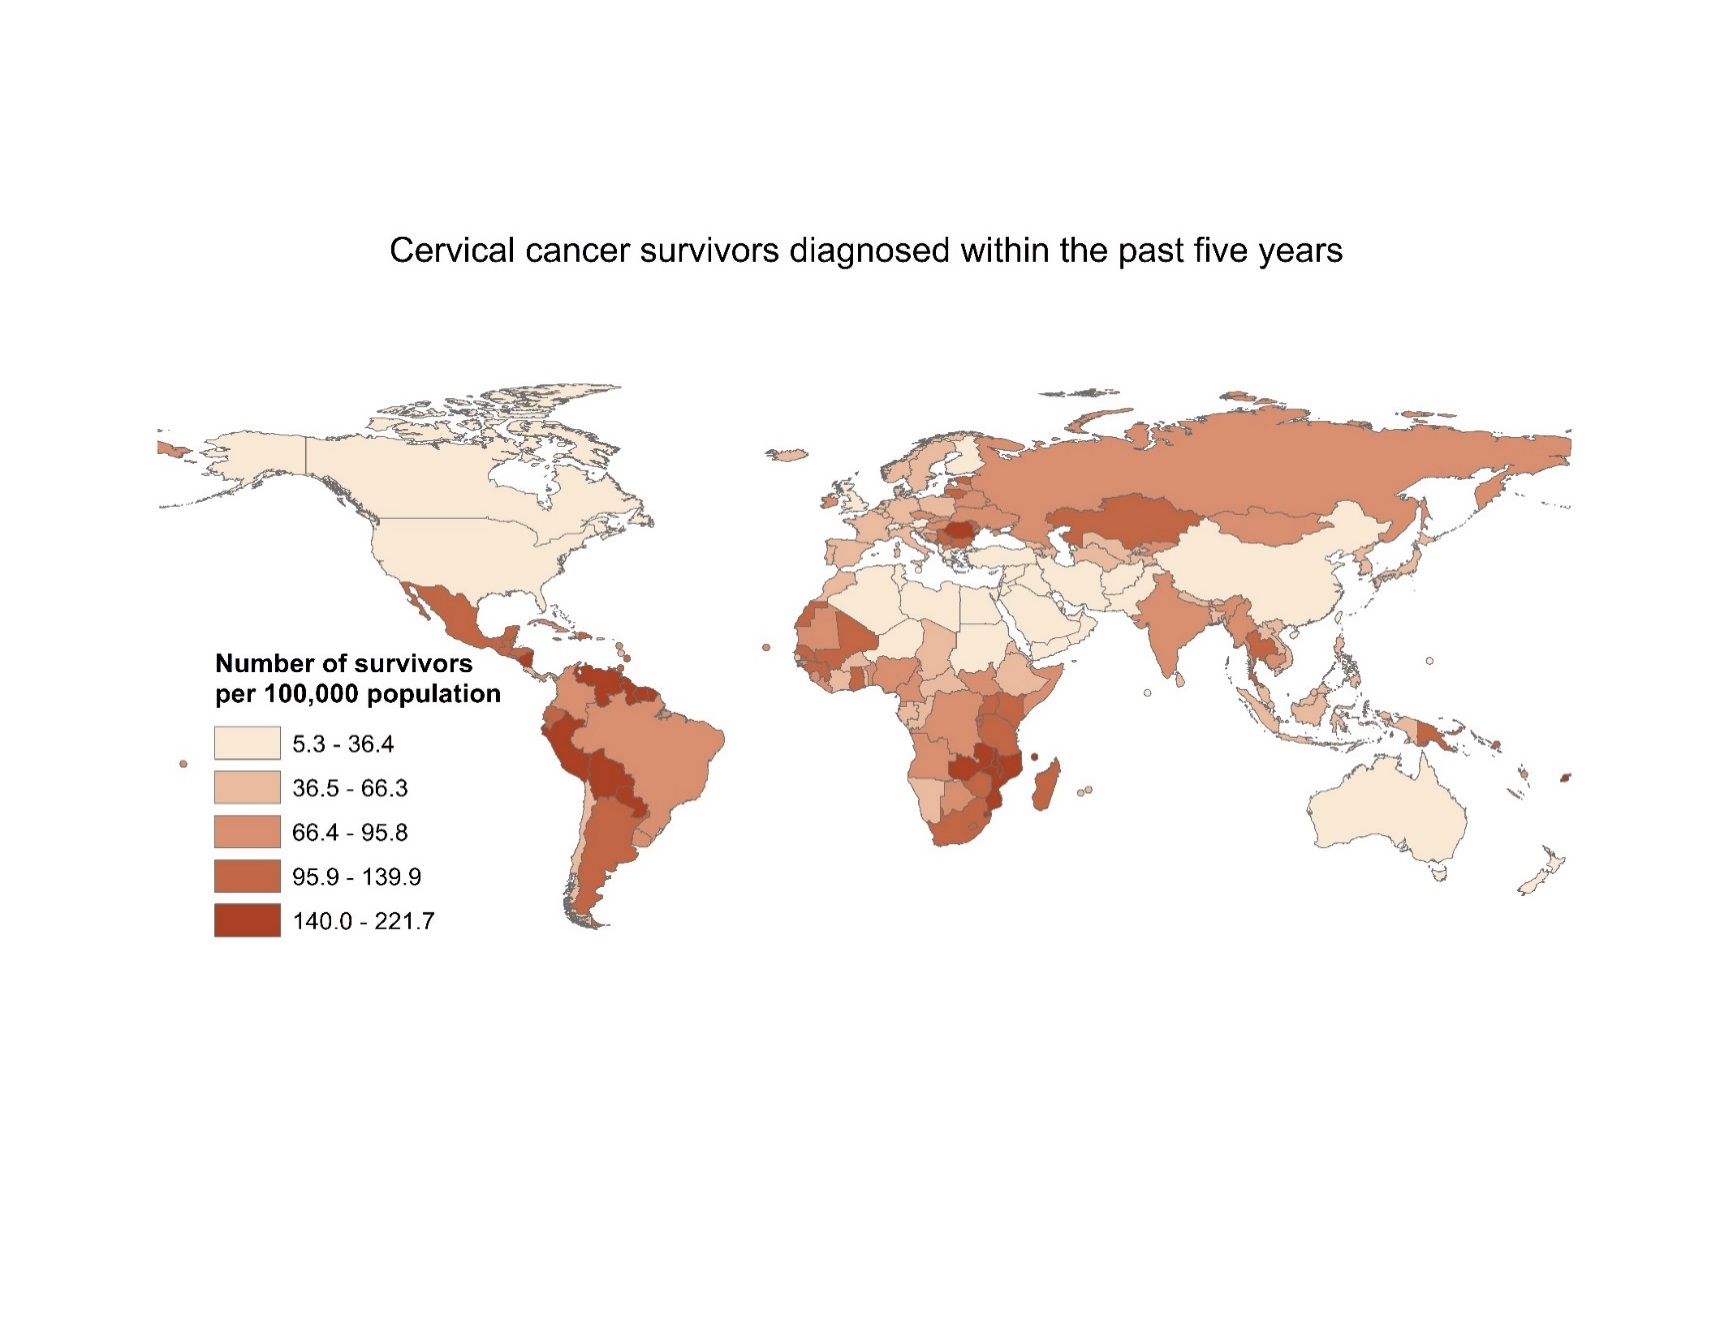


**Supplementary Figure S8.** Uterine corpus cancer incidence and mortality rates, females, age-standardized rate (world), 2012


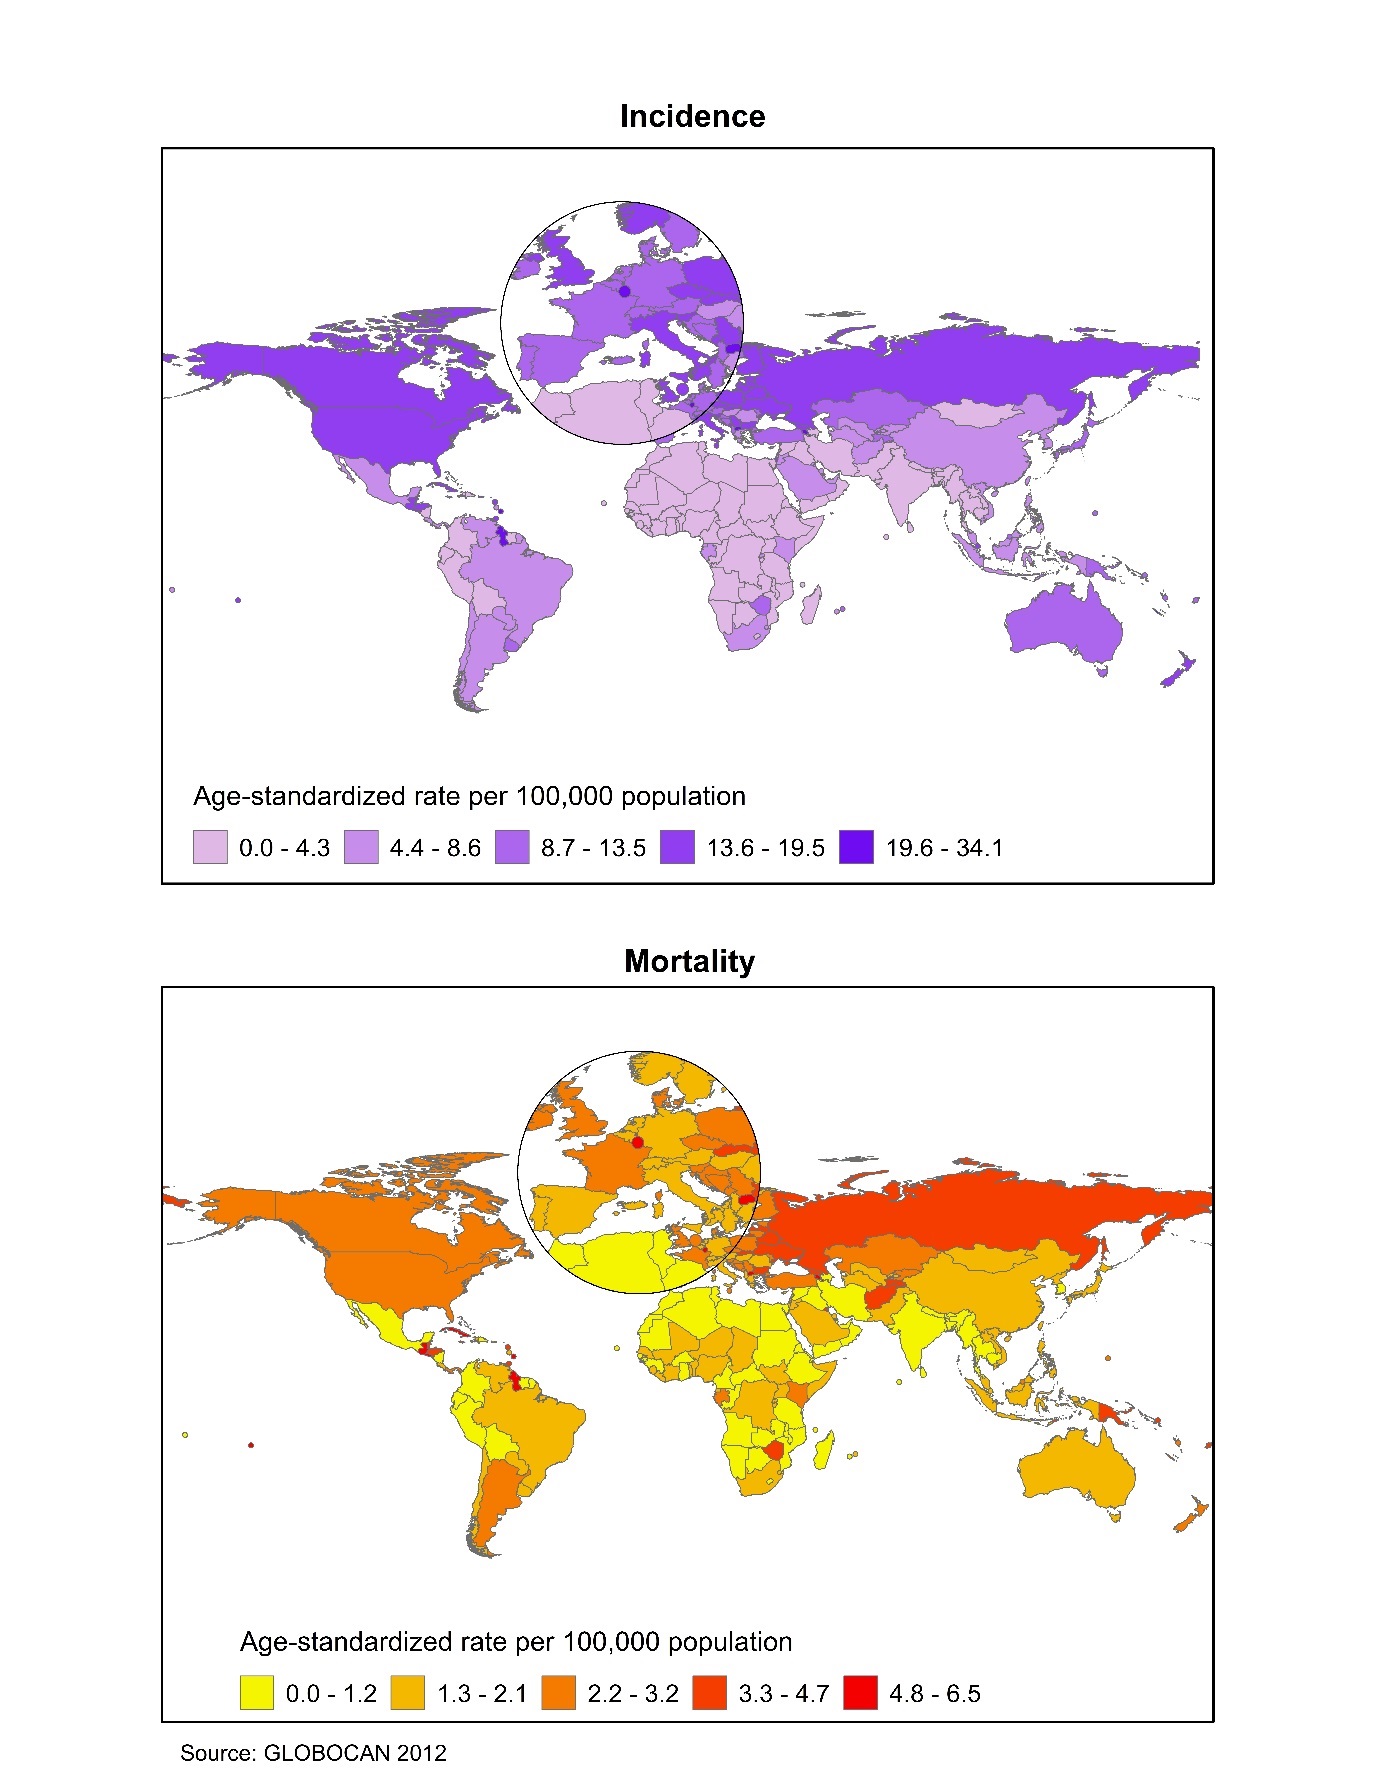


**Supplementary Figure S9.** Uterine corpus cancer mortality trends, age-standardized rate (world), select countries, 1990-2014


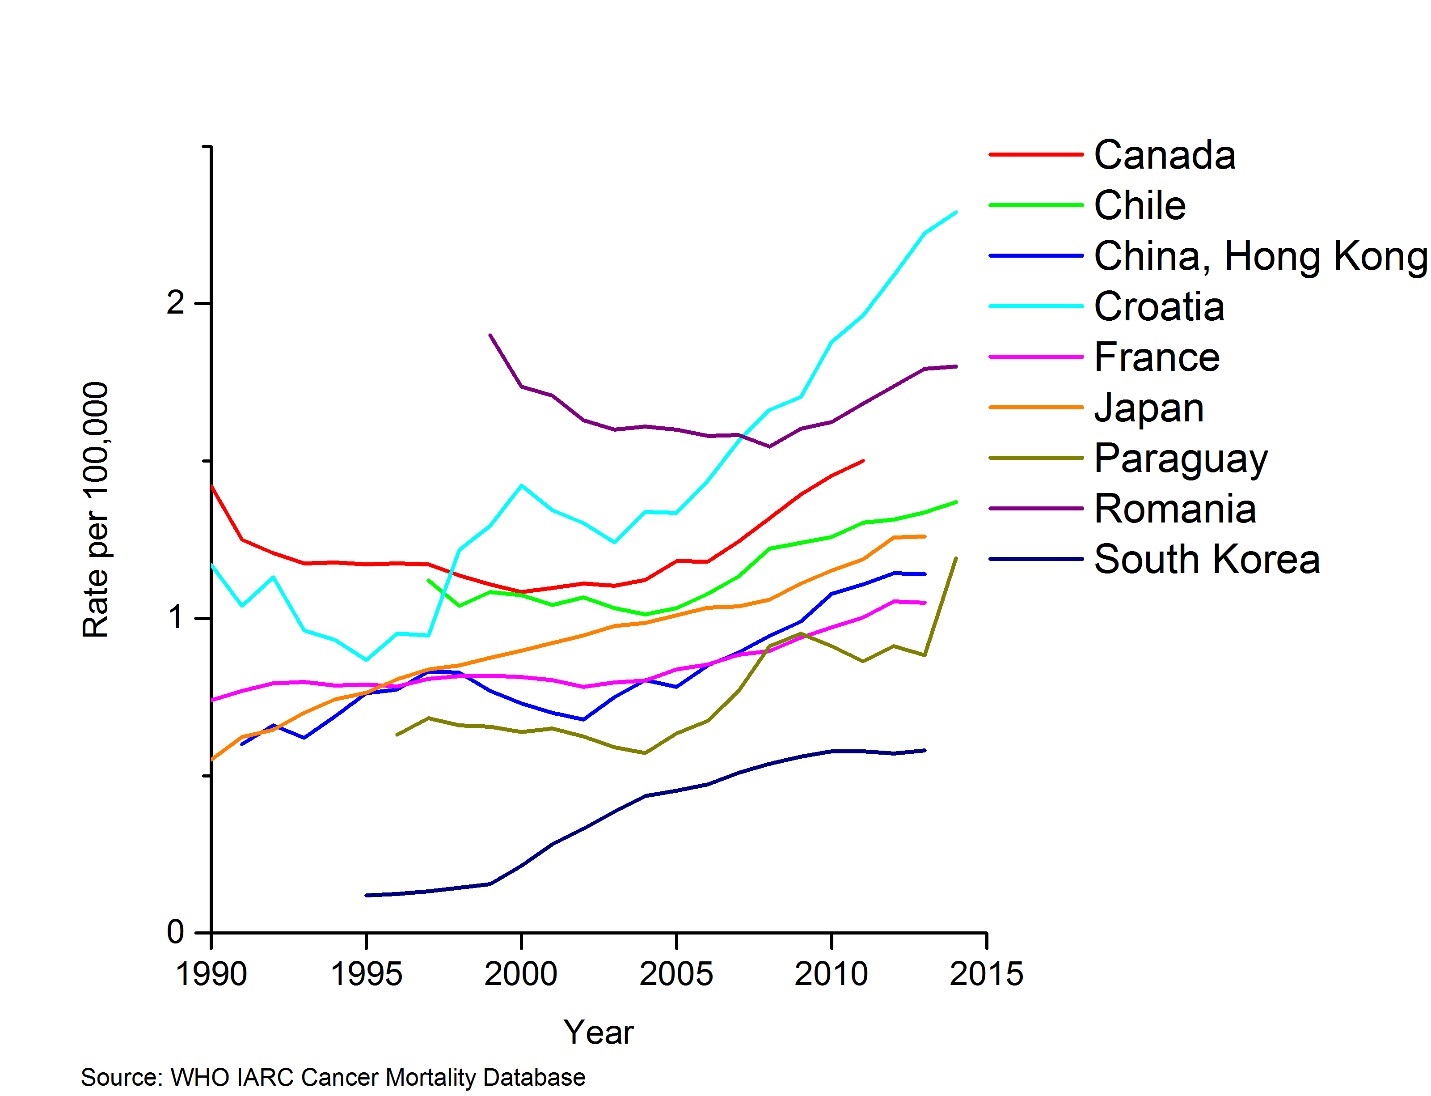


**Supplementary Figure S10.** Ovarian cancer incidence and mortality rates, females, age-standardized rate (world), 2012


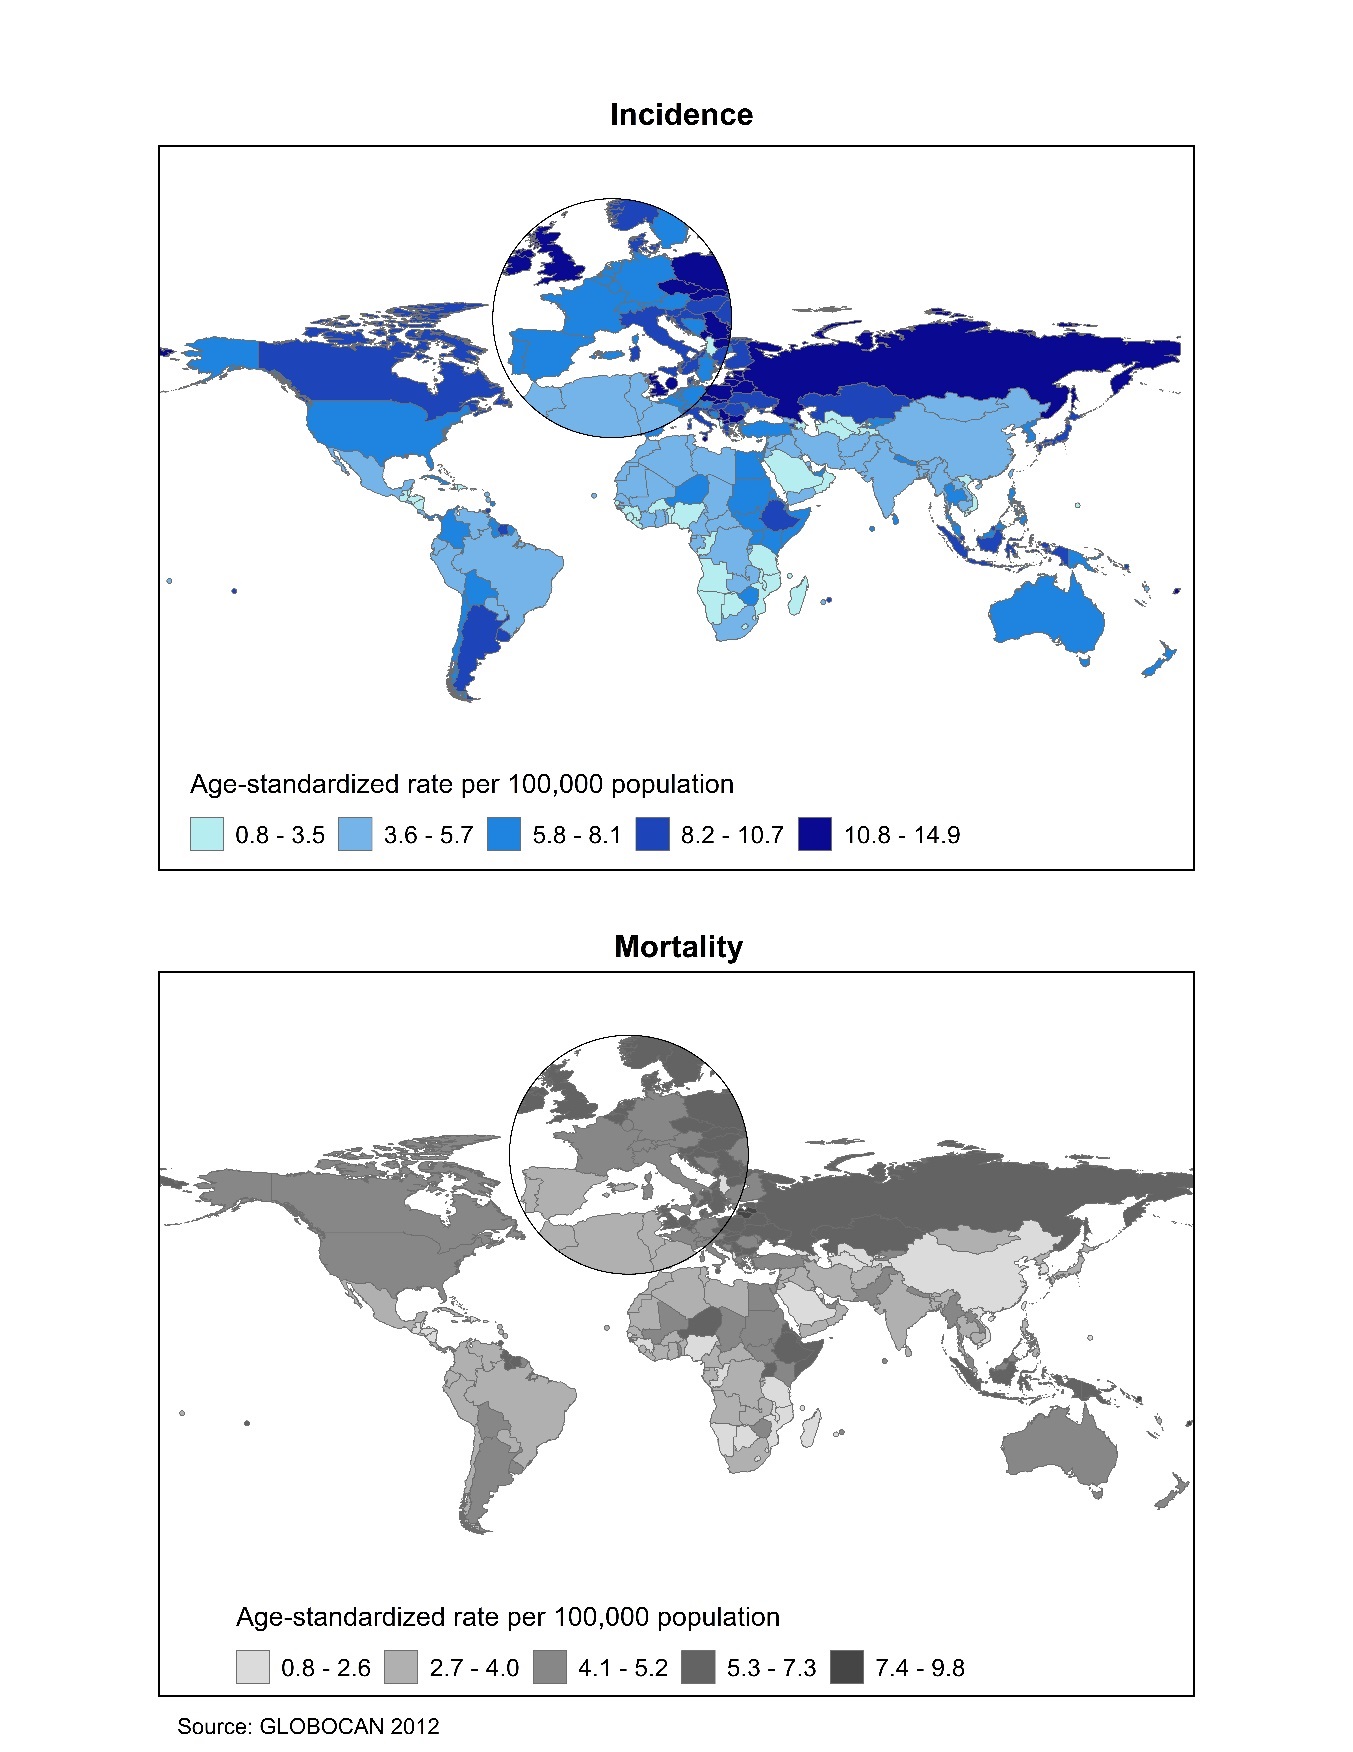


**Supplementary Figure S11.** Ovarian cancer mortality trends, age-standardized rate (world), select countries, 1980-2014


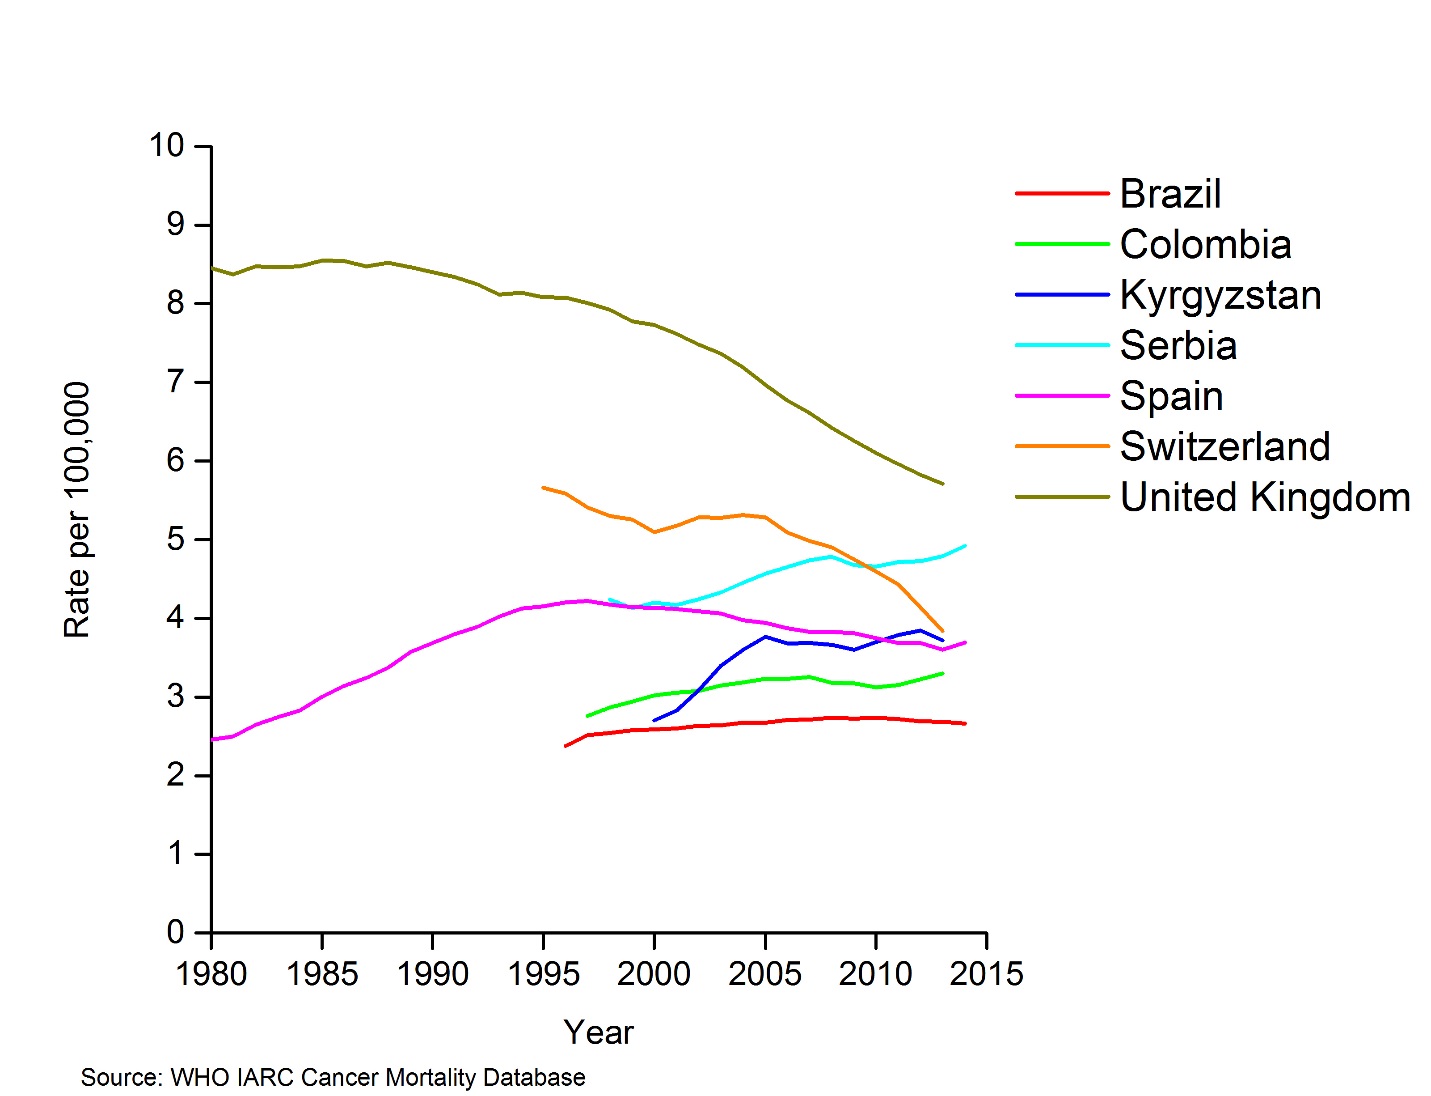


**Supplementary Figure S12.** Colorectal cancer incidence and mortality rates, females, age-standardized rate (world), 2012


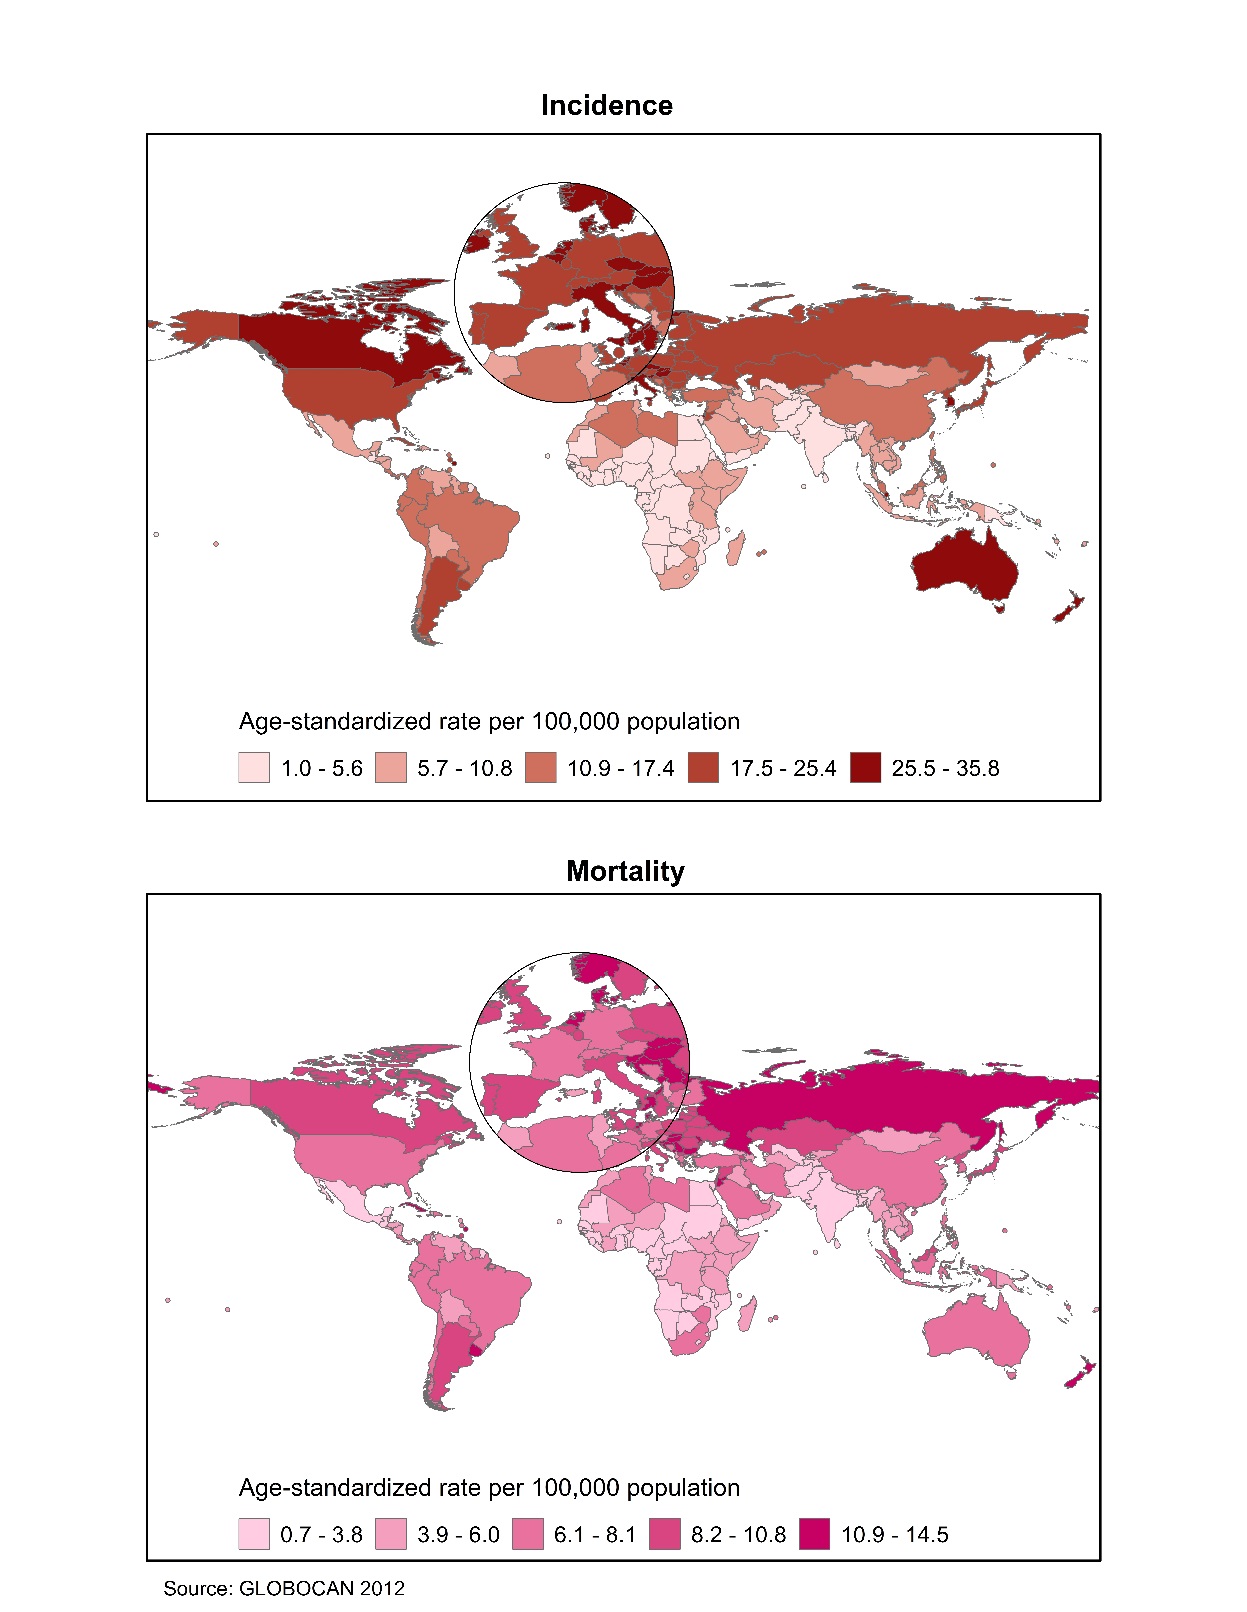


**Supplementary Figure S13.** Colorectal cancer incidence trends, females, select countries, 1980-2014


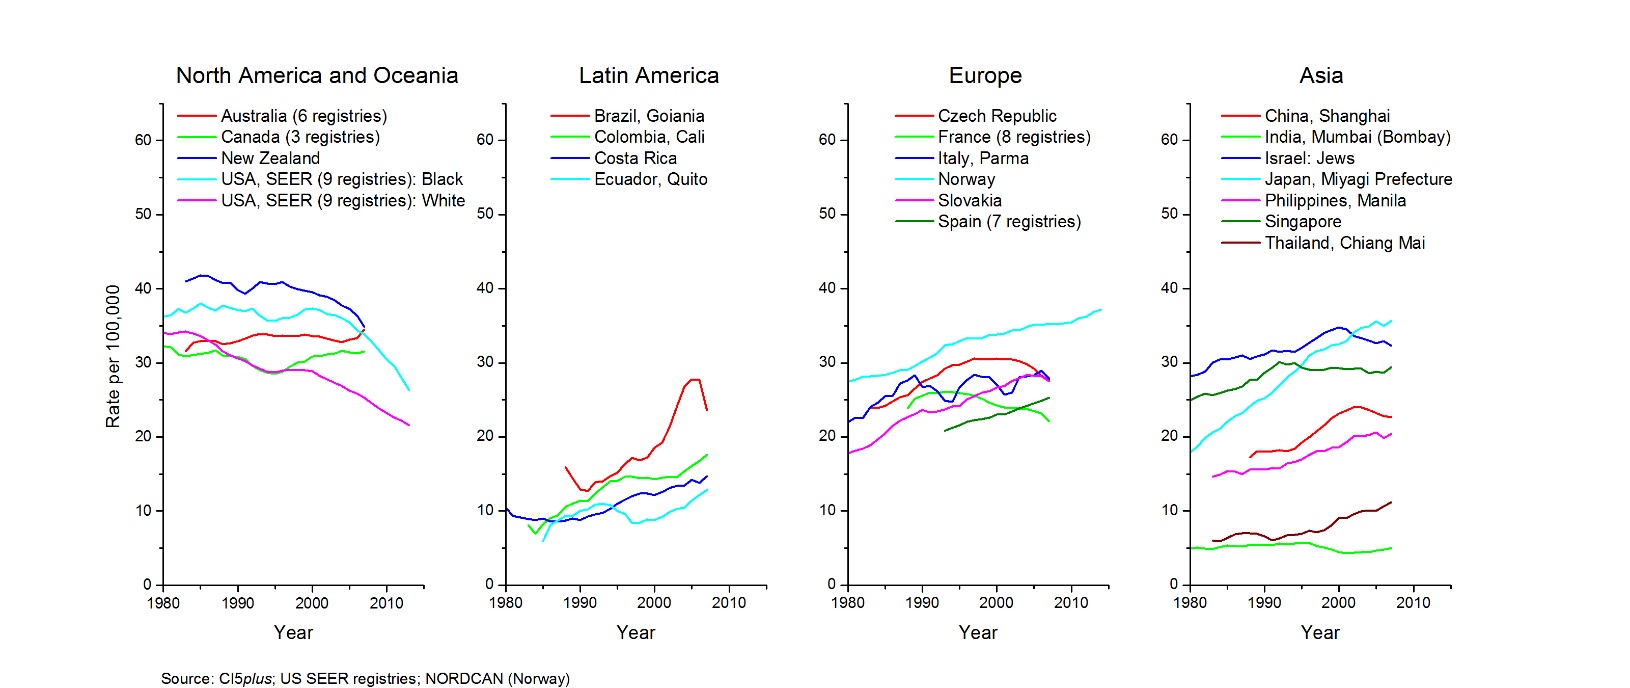


**Supplementary Figure S14.** Colorectal cancer mortality trends, females, age-standardized rate (world), select countries, 1975-2014


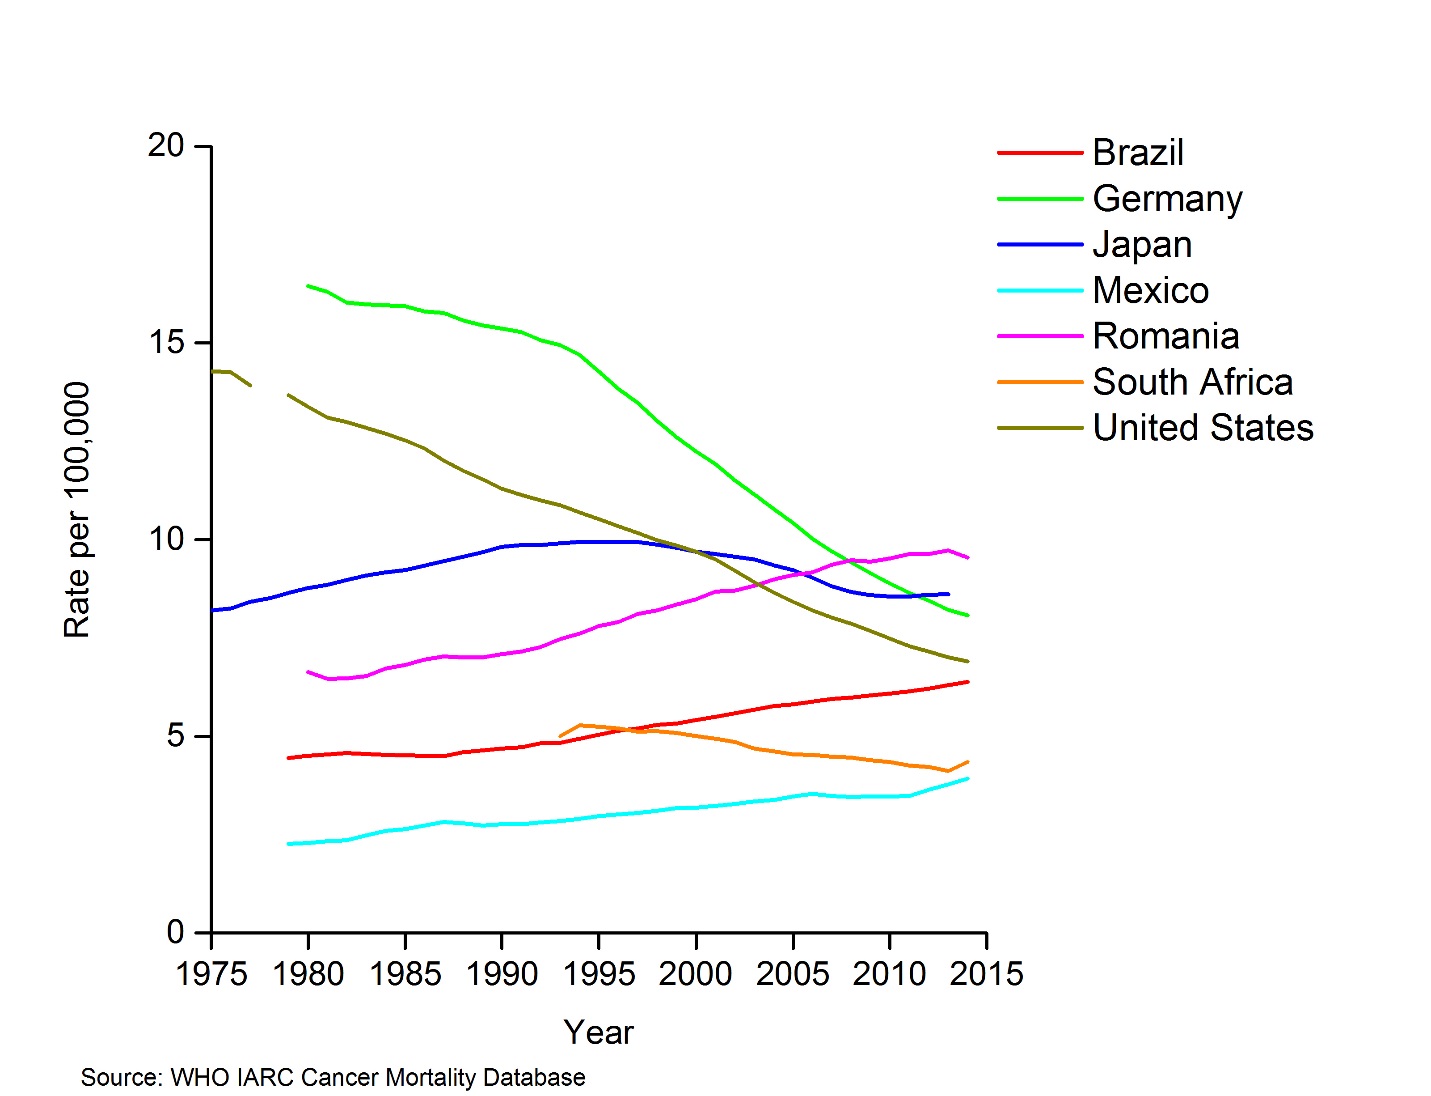


**Supplementary Figure S15.** Lung cancer incidence and mortality rates, females, age-standardized rate (world), 2012


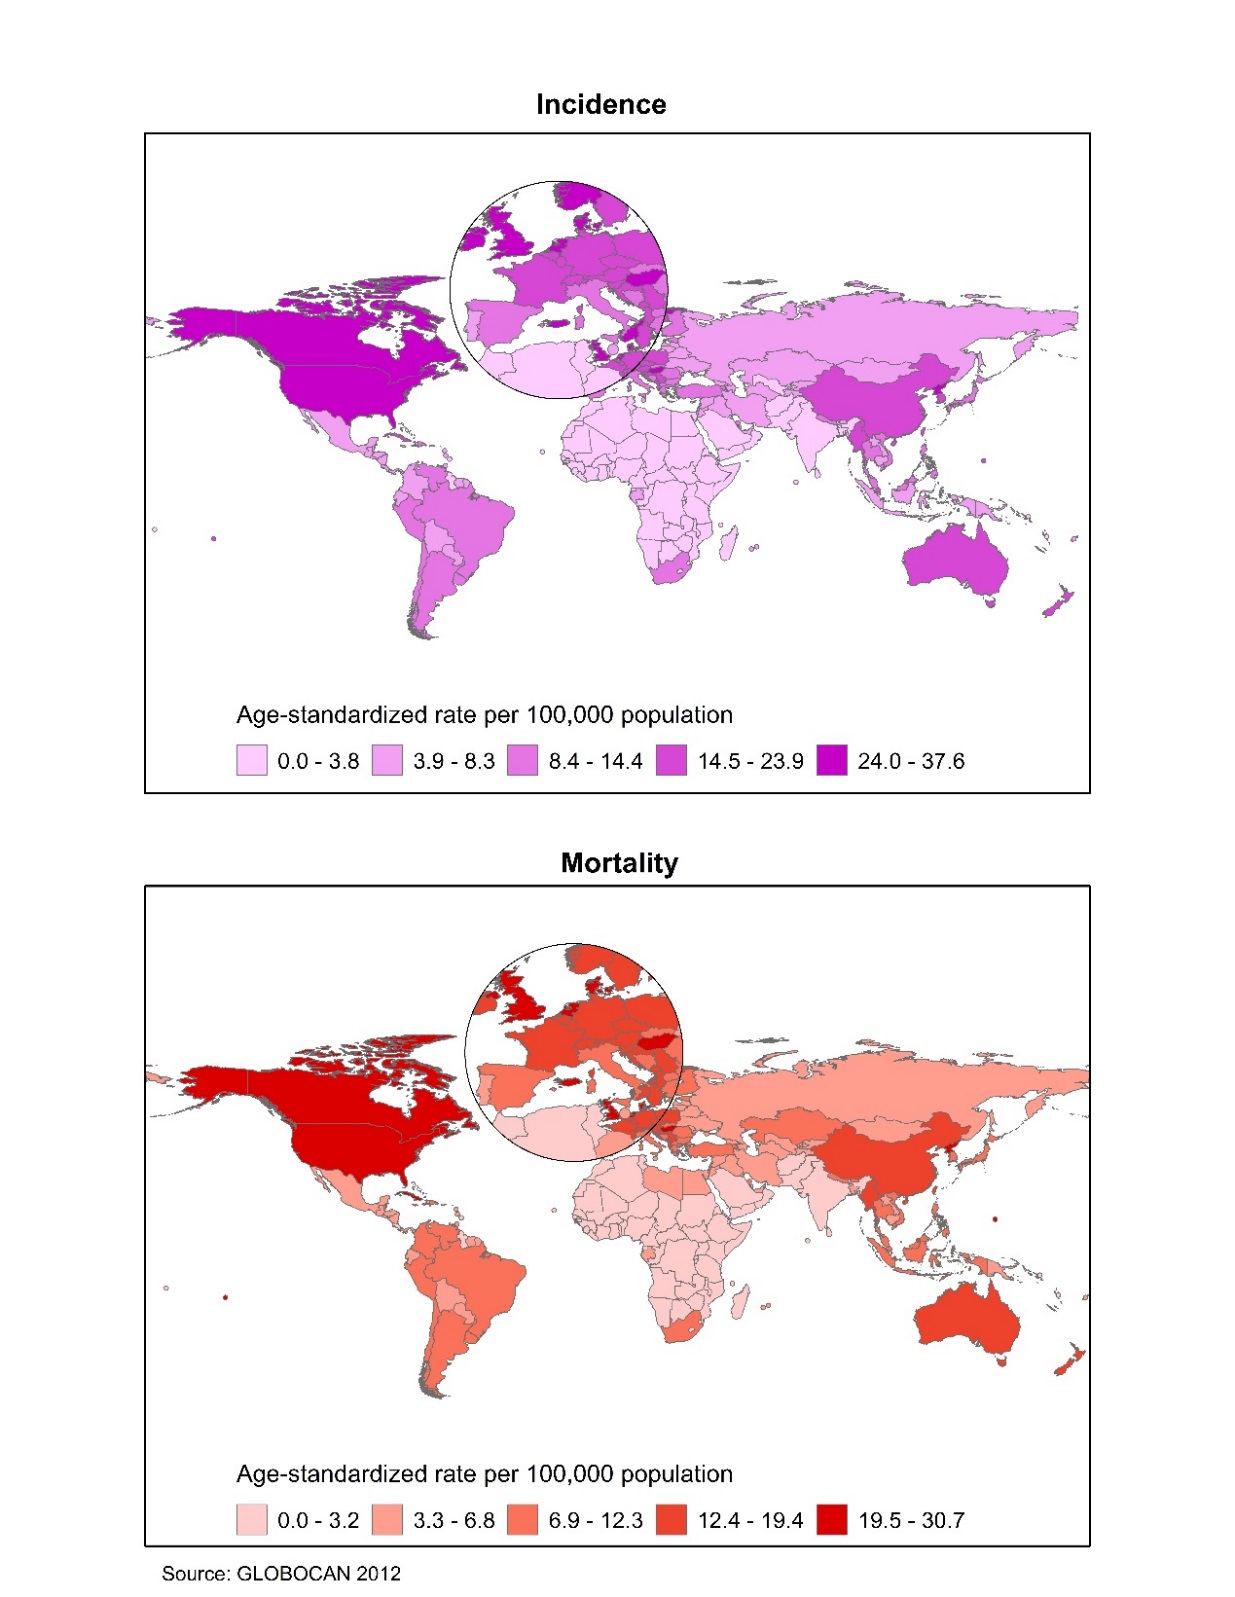


**Supplementary Figure S16.** Population using solid fuels for heating and/or cooking, 2013


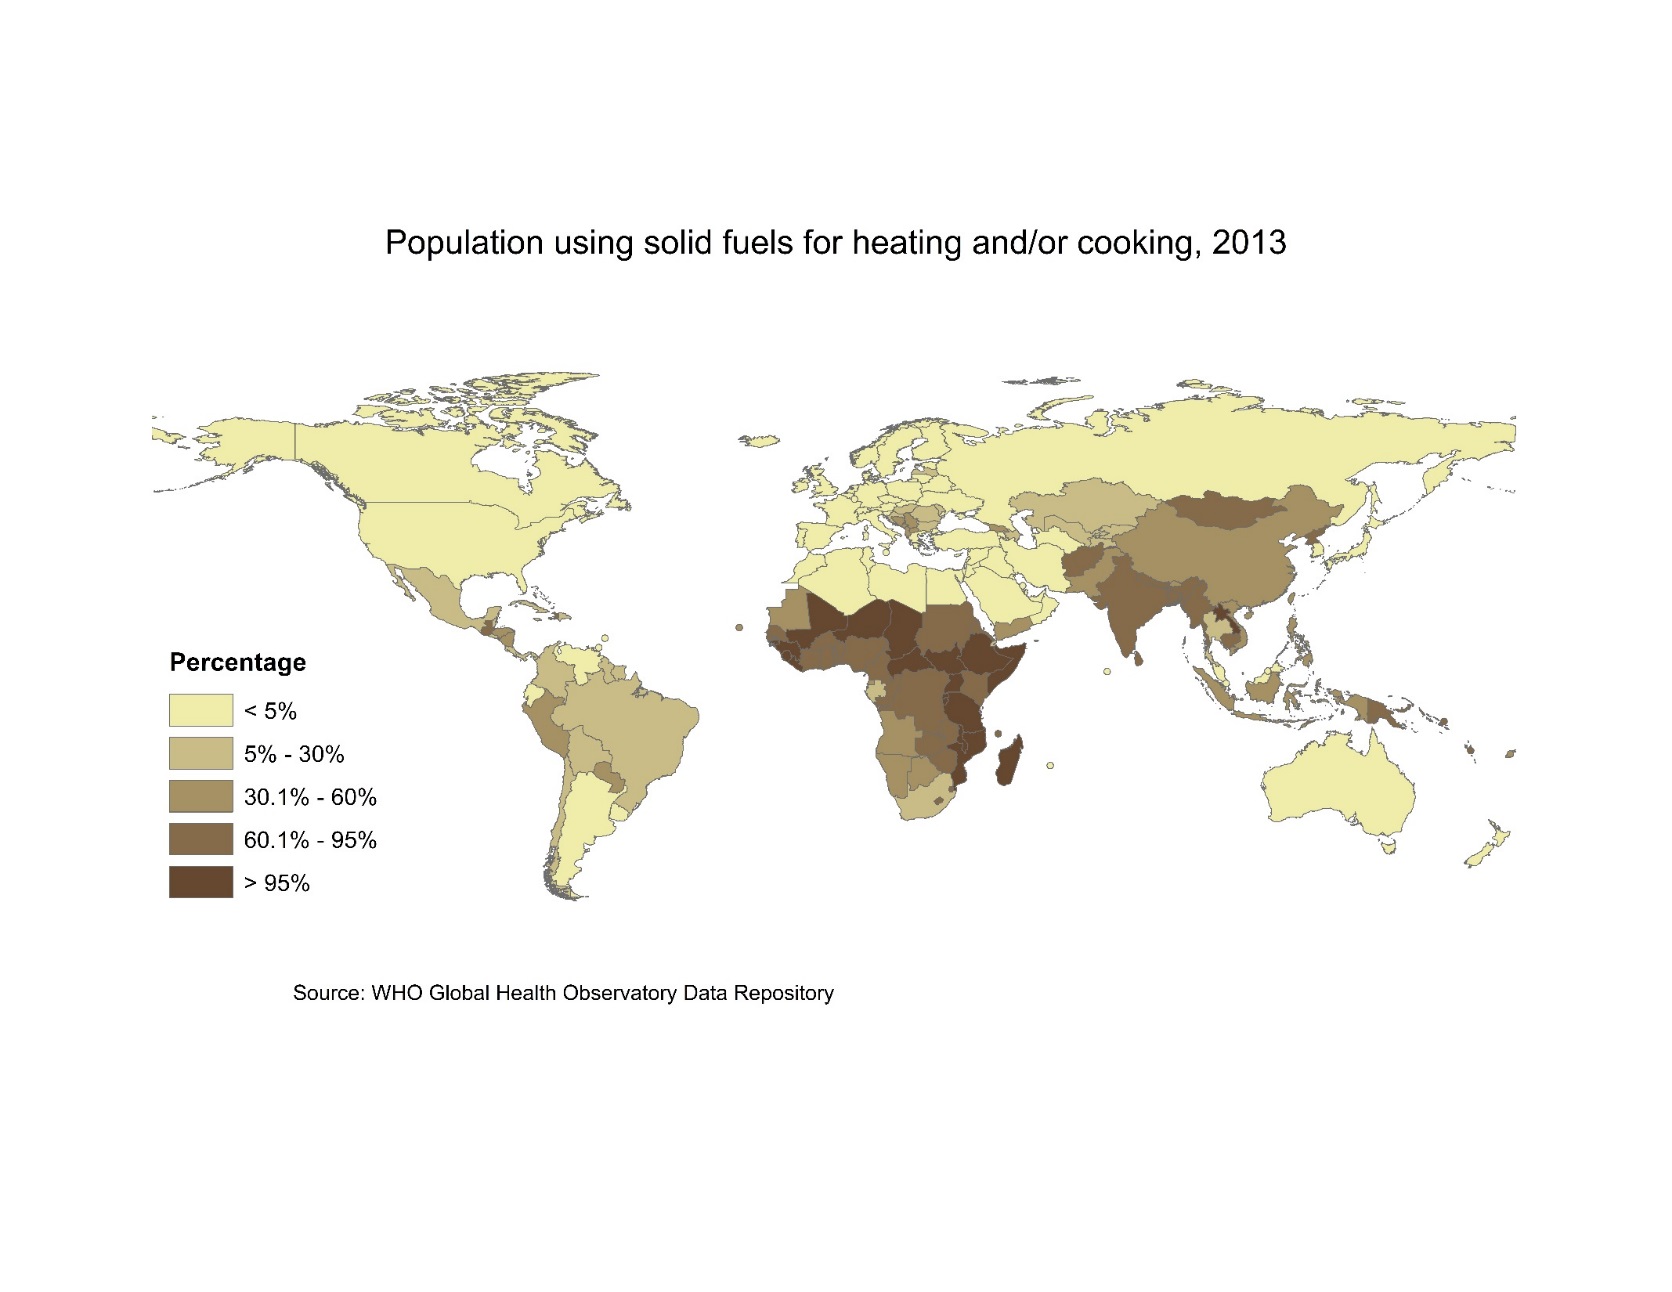


**Supplementary Figure S17.** Adult female smoking prevalence, age 15+ years, 2013


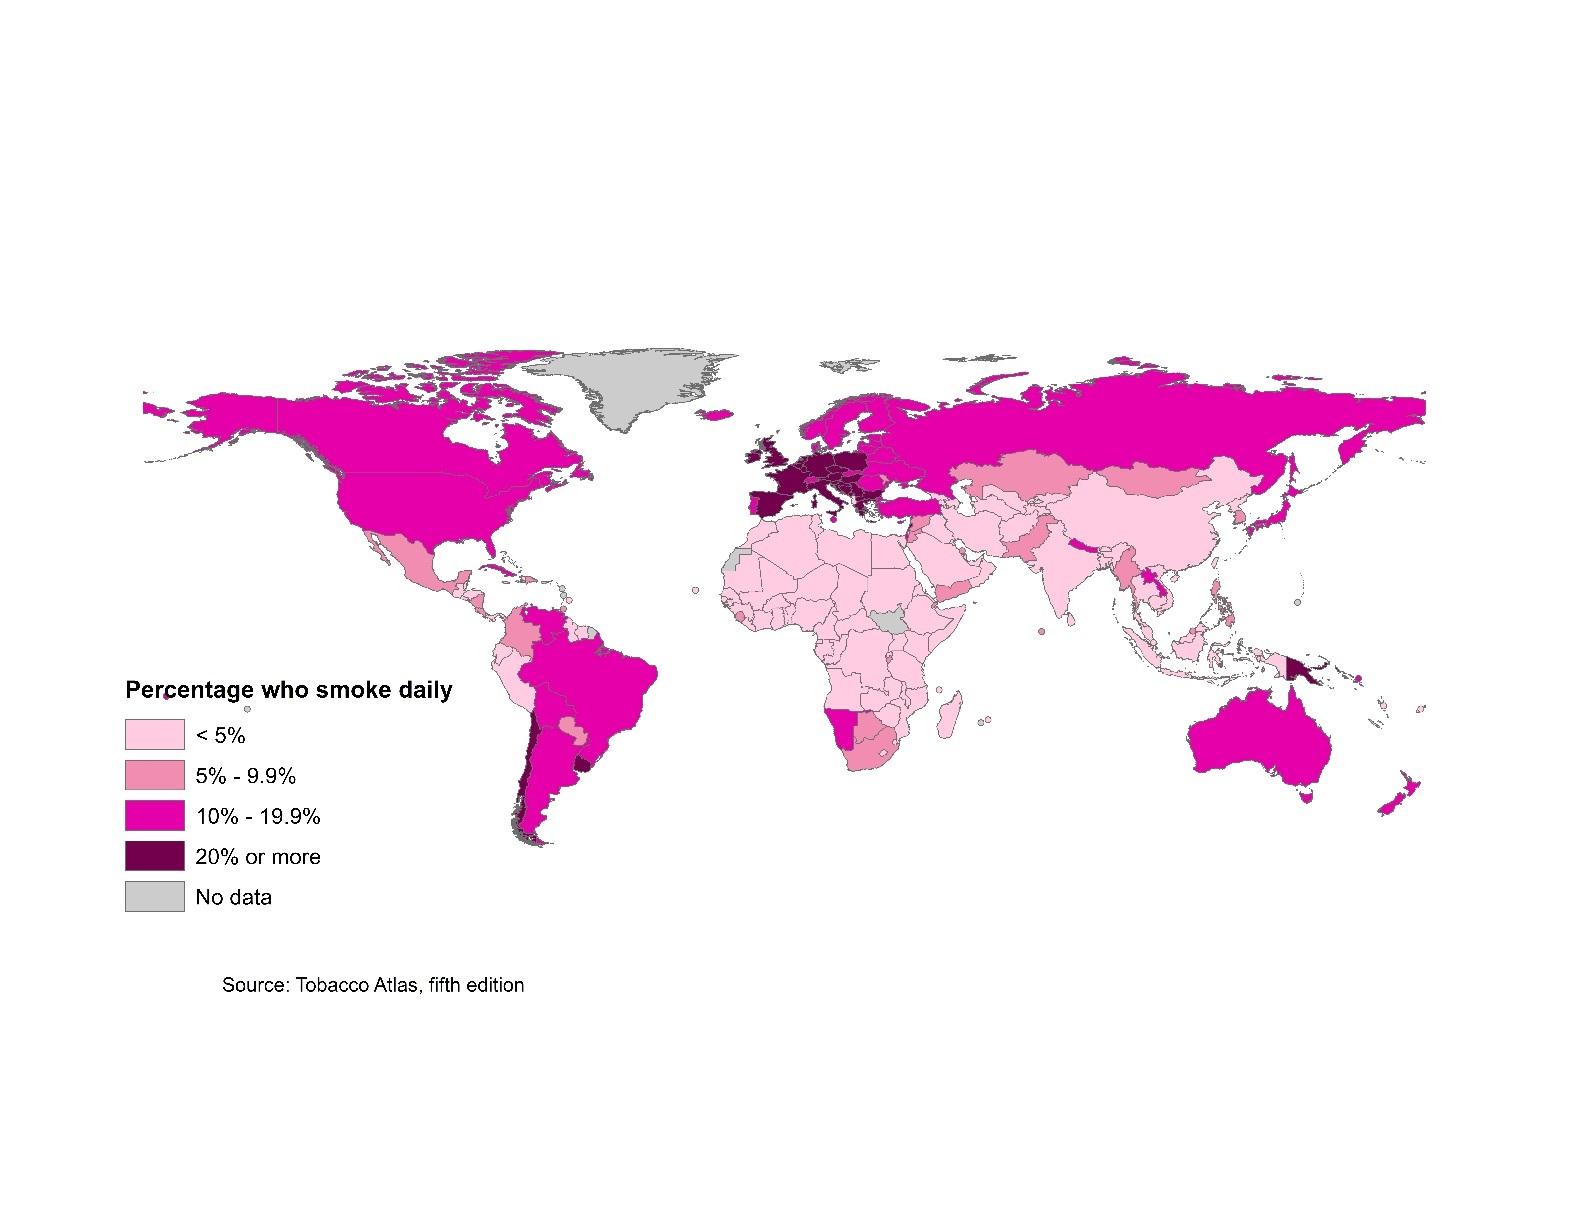


**Supplementary Figure S18.** Female youth smoking prevalence, age 13-15 years, 2011 or latest available data


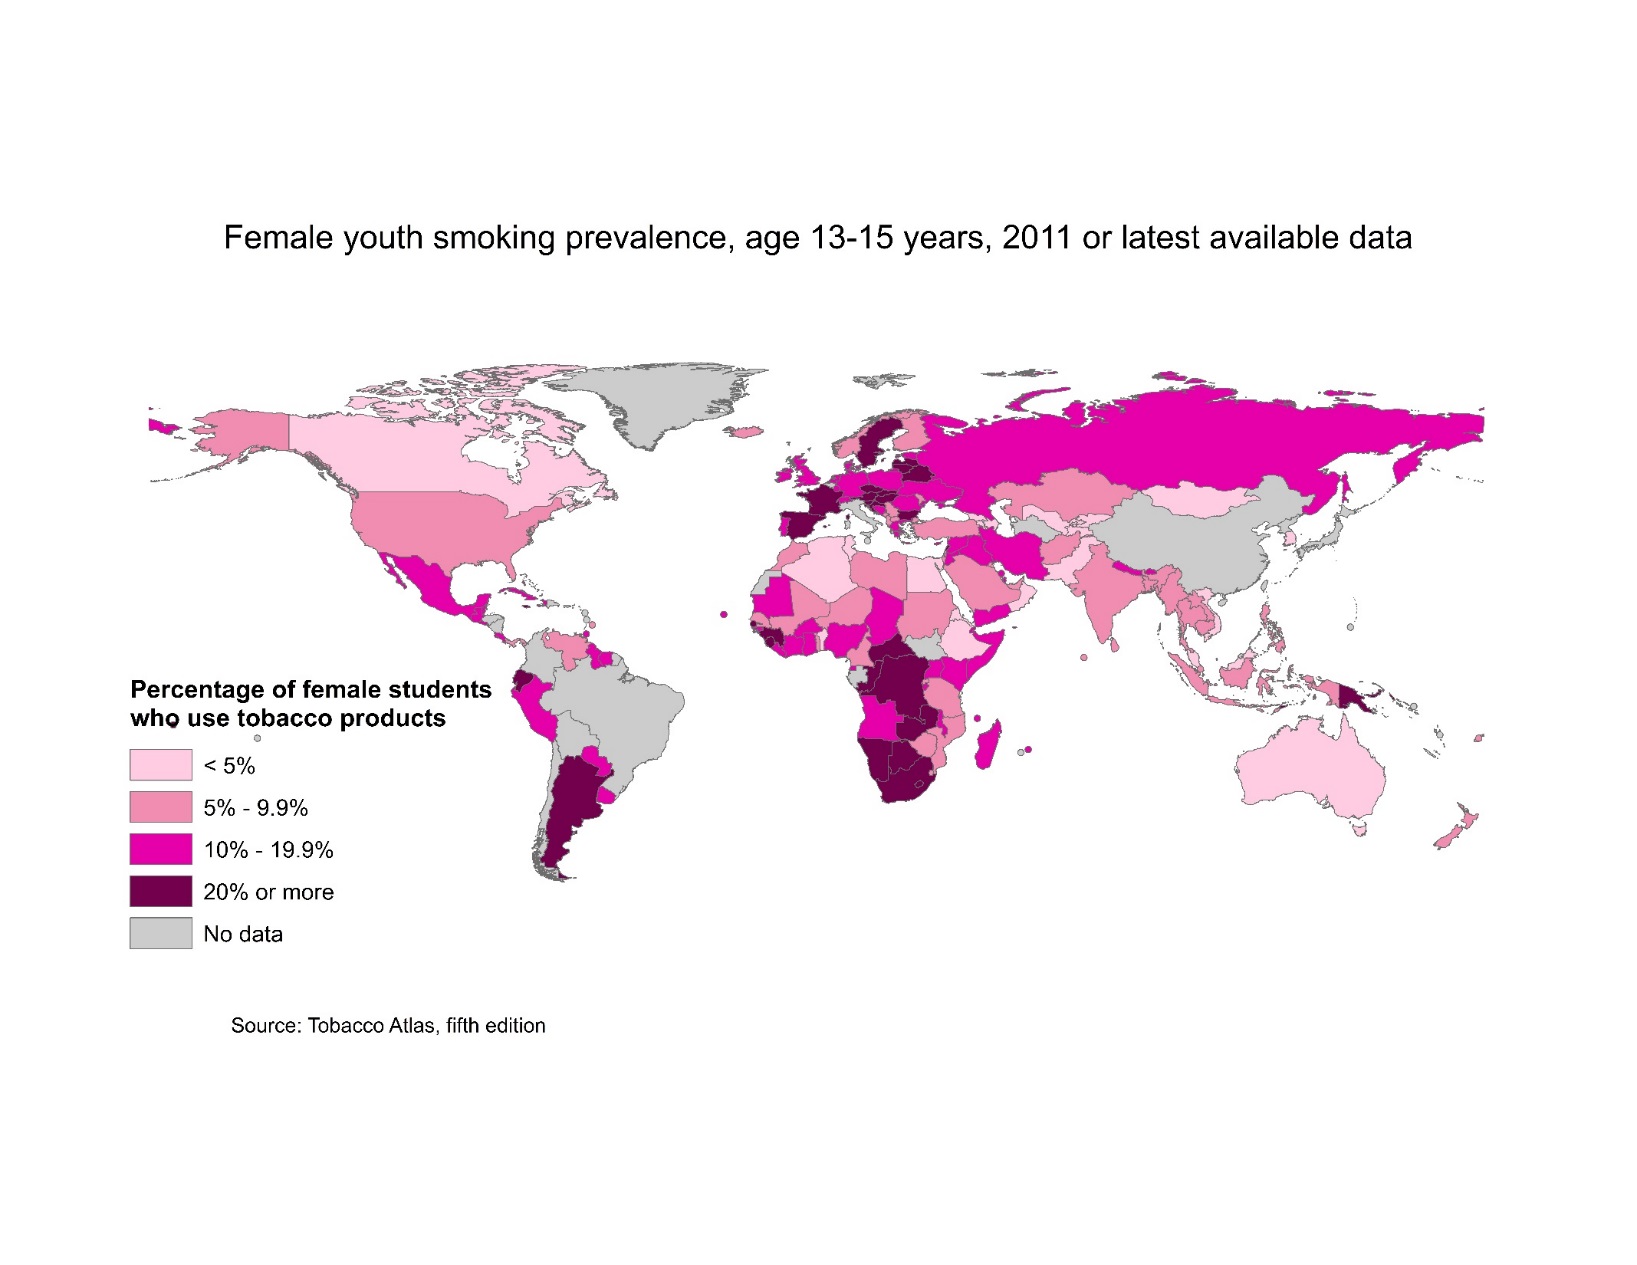


**Supplementary Figure S19.** Liver cancer incidence and mortality rates, females, age-standardized rate (world), 2012


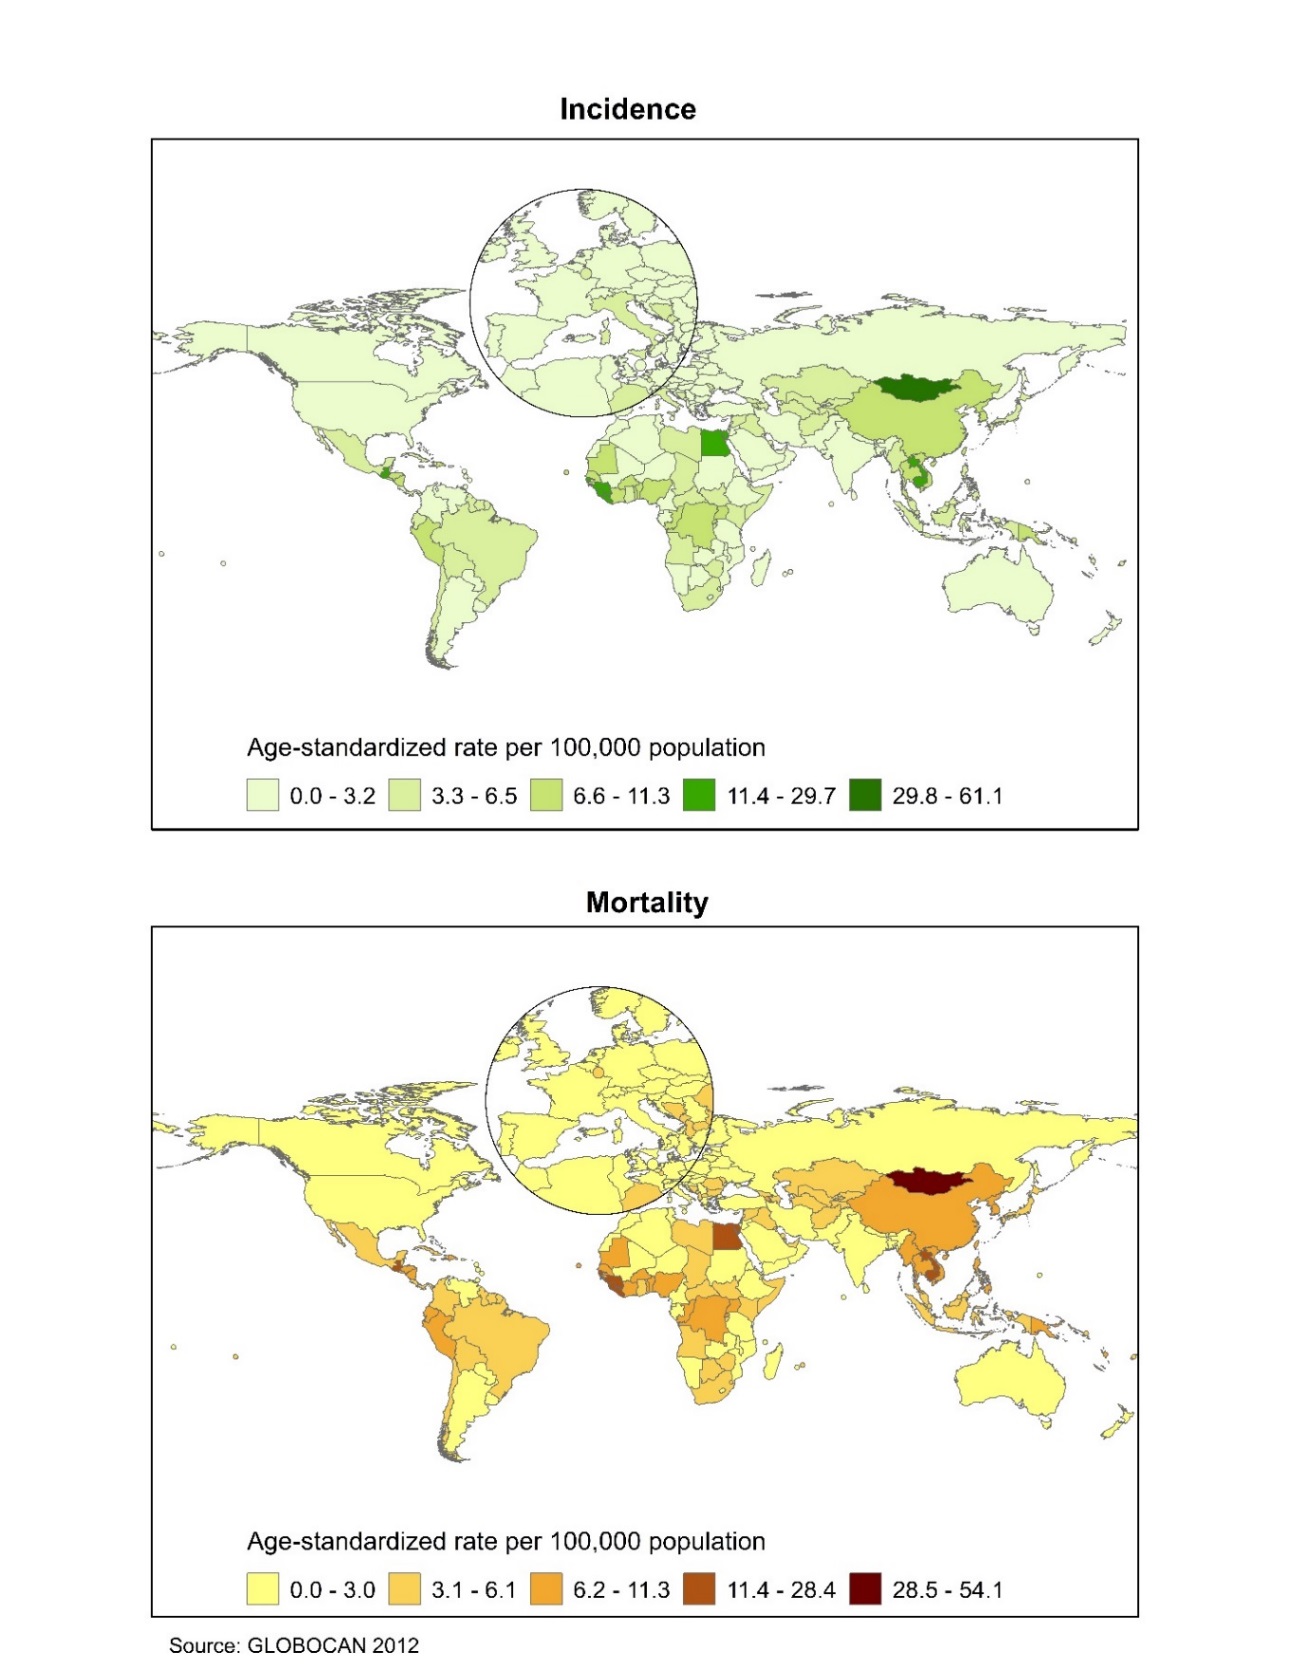


**Supplementary Figure S20.** Hepatitis B virus prevalence, both sexes, from systematic review of studies 1957-2013


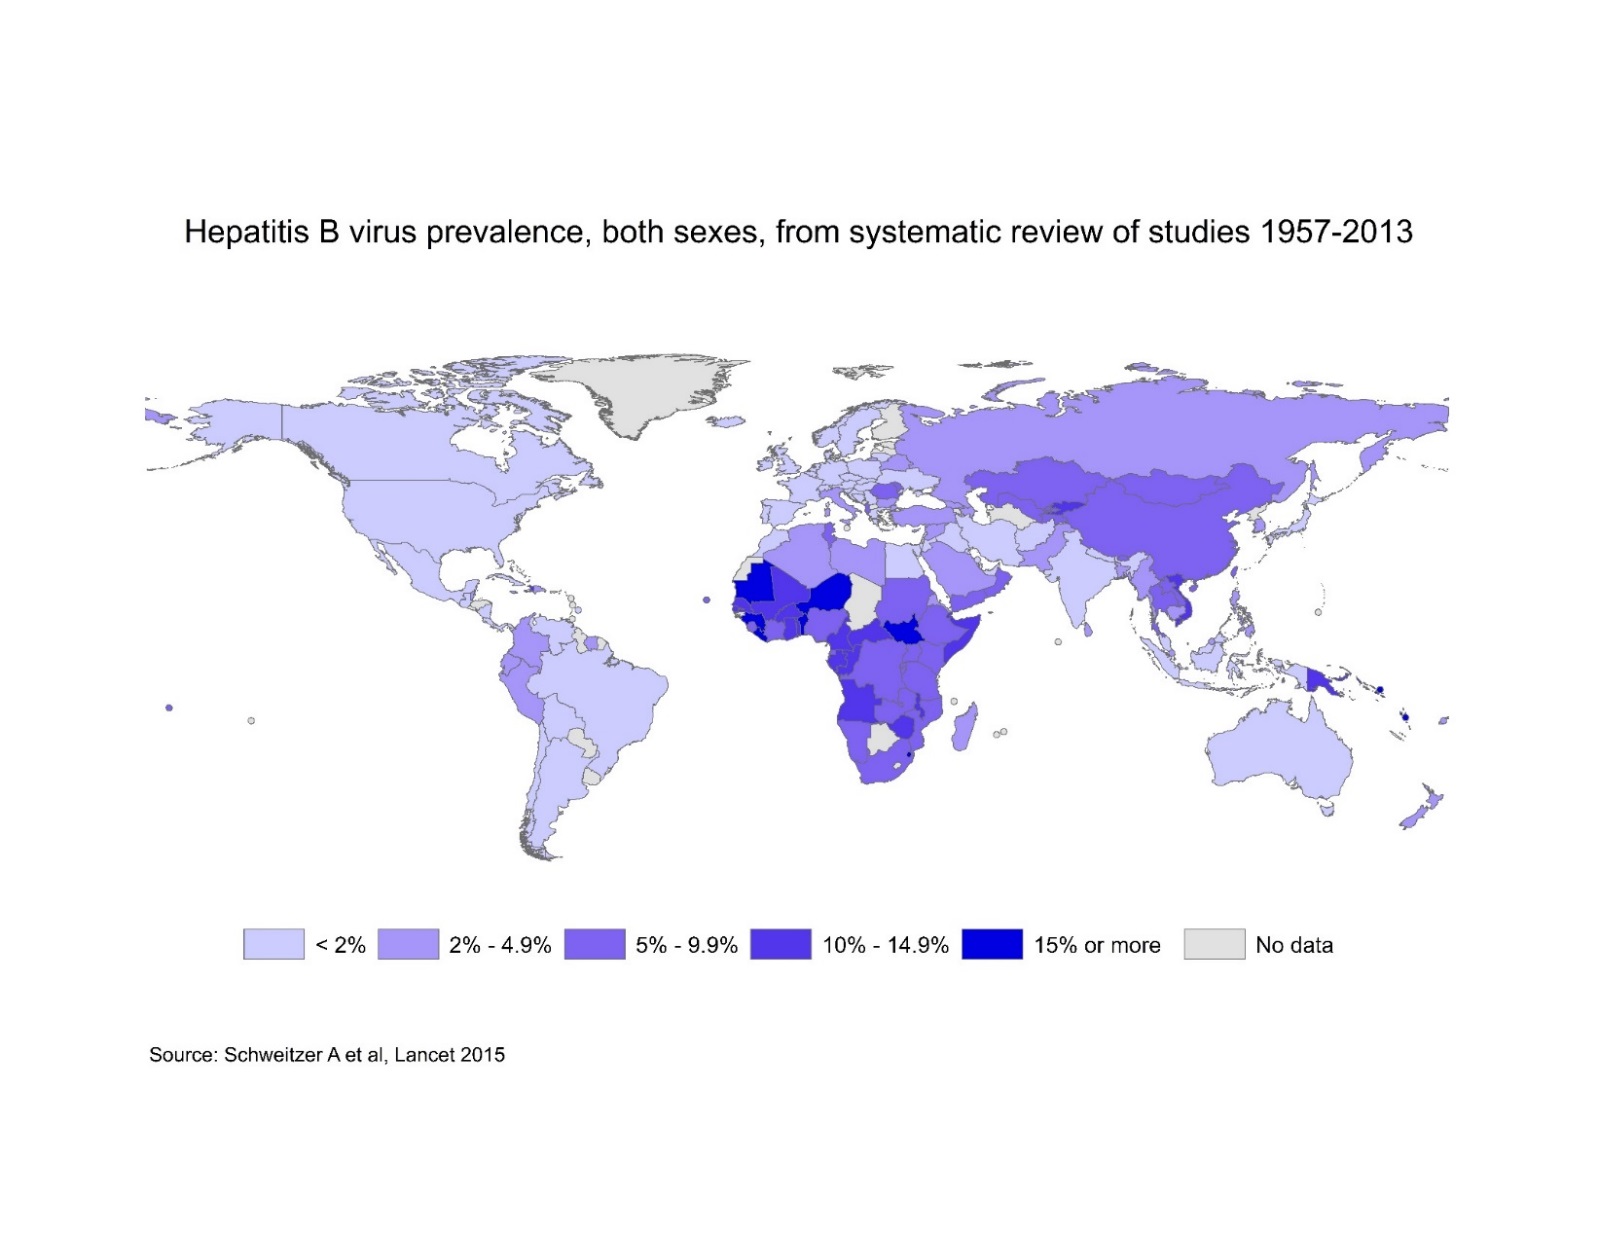


**Supplementary Figure S21.** Estimated hepatitis C virus prevalence, both sexes, 2005


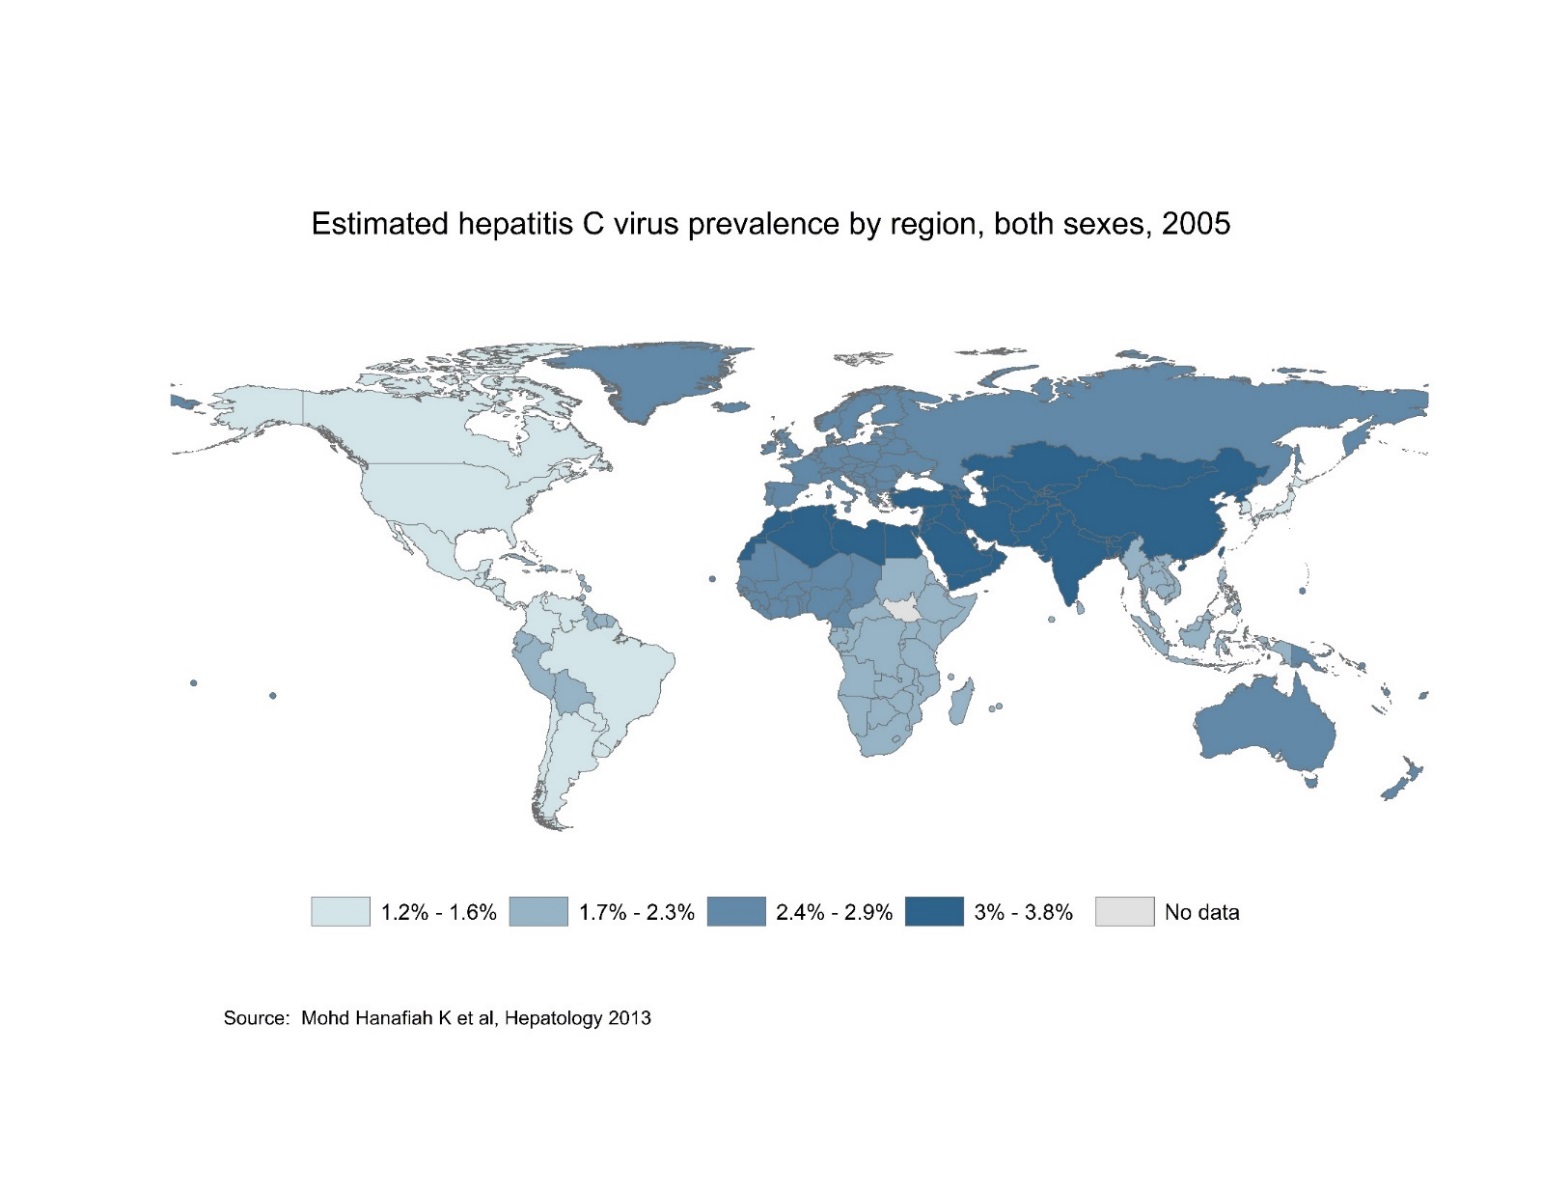


**Supplementary Figure S22.** Liver cancer mortality trends, females, age-standardized rate (world), select countries, 1995-2014


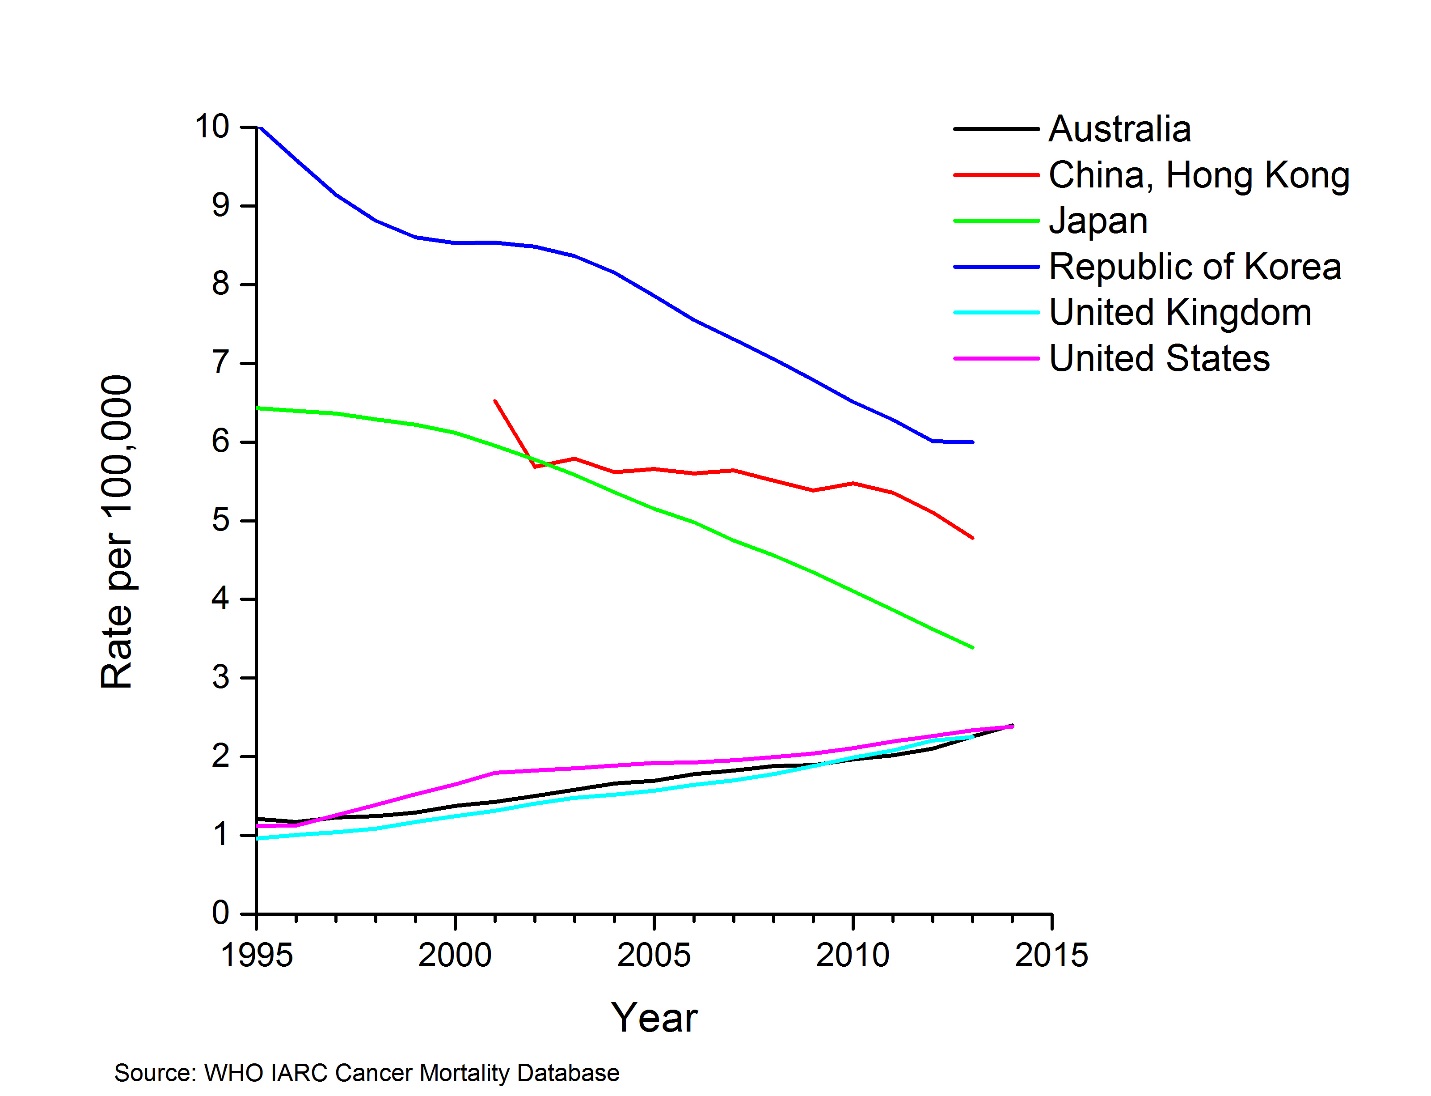

Supplement: 10559965epi160858-sup-supplement_paper1_23feb2017.docx [file 10559965epi160858-sup-supplement_paper1_23feb2017.docx]
